# Supplementary material for: A multi-stimuli responsive ruthenium complex for catalytic water oxidation
Source: Royal Society of Chemistry journal article supplement (doi:10.1039/d0cc04940a), 2020-01-01
Supplement: d0cc04940a1.pdf [file d0cc04940a1.pdf]

## Supporting Information for

# A Multi-Stimuli Responsive Ruthenium Complex for Catalytic Water Oxidation

Masanari Hirahara\*<sup>a</sup>, Hiroki Goto, Masayuki Yagi, and Yasushi Umemura <sup>a</sup>

Department of Applied Chemistry, School of Applied Science, National Defense Academy of Japan,  
Hashirimizu 1-10-20, Yokosuka, Kanagawa, 239-8686

## Supporting Information

### Contents

|                                                                                                                                   |     |
|-----------------------------------------------------------------------------------------------------------------------------------|-----|
| <i>Experimental details</i>                                                                                                       | S3  |
| General considerations                                                                                                            | S3  |
| Synthesis of C <sub>2</sub> pyqu                                                                                                  | S6  |
| Synthesis of <i>proximal</i> -[Ru(C <sub>2</sub> tpy)(C <sub>2</sub> pyqu)Cl]Cl                                                   | S6  |
| Synthesis of <i>proximal</i> - <b>1</b>                                                                                           | S7  |
| Synthesis of <i>distal</i> - <b>1</b>                                                                                             | S7  |
| <br>                                                                                                                              |     |
| <i>NMR spectra</i>                                                                                                                | S9  |
| Figure S1— <sup>1</sup> H NMR spectrum of C <sub>2</sub> pq                                                                       | S9  |
| Figure S2— <sup>13</sup> C{ <sup>1</sup> H} NMR spectrum of C <sub>2</sub> pq                                                     | S9  |
| Figure S3— <sup>1</sup> H/ <sup>1</sup> H COSY NMR spectrum of C <sub>2</sub> pq                                                  | S10 |
| Figure S4— <sup>1</sup> H/ <sup>13</sup> C HSQC NMR spectrum of C <sub>2</sub> pq                                                 | S10 |
| Figure S5— <sup>1</sup> H/ <sup>13</sup> C HMBC NMR spectrum of C <sub>2</sub> pq                                                 | S10 |
| Figure S6— <sup>1</sup> H NMR spectrum of <i>proximal</i> -[Ru(C <sub>2</sub> tpy)(C <sub>2</sub> pq)Cl]Cl                        | S11 |
| Figure S7— <sup>13</sup> C{ <sup>1</sup> H} NMR spectrum of <i>proximal</i> -[Ru(C <sub>2</sub> tpy)(C <sub>2</sub> pq)Cl]Cl      | S11 |
| Figure S8— <sup>1</sup> H/ <sup>1</sup> H COSY NMR spectrum of <i>proximal</i> -[Ru(C <sub>2</sub> tpy)(C <sub>2</sub> pq)Cl]Cl   | S12 |
| Figure S9— <sup>1</sup> H/ <sup>13</sup> C HSQC NMR spectrum of <i>proximal</i> -[Ru(C <sub>2</sub> tpy)(C <sub>2</sub> pq)Cl]Cl  | S12 |
| Figure S10— <sup>1</sup> H/ <sup>13</sup> C HMBC NMR spectrum of <i>proximal</i> -[Ru(C <sub>2</sub> tpy)(C <sub>2</sub> pq)Cl]Cl | S12 |
| Figure S11— <sup>1</sup> H NMR spectrum of <i>proximal</i> - <b>1</b>                                                             | S13 |
| Figure S12— <sup>13</sup> C{ <sup>1</sup> H} NMR spectrum of <i>proximal</i> - <b>1</b>                                           | S13 |
| Figure S13— <sup>1</sup> H/ <sup>1</sup> H COSY NMR spectrum of <i>proximal</i> - <b>1</b>                                        | S14 |
| Figure S14— <sup>1</sup> H/ <sup>13</sup> C HSQC NMR spectrum of <i>proximal</i> - <b>1</b>                                       | S14 |
| Figure S15— <sup>1</sup> H/ <sup>13</sup> C HMBC NMR spectrum of <i>proximal</i> - <b>1</b>                                       | S15 |
| Figure S16— <sup>1</sup> H NMR spectrum of <i>distal</i> - <b>1</b>                                                               | S16 |
| Figure S17— <sup>13</sup> C{ <sup>1</sup> H} NMR spectrum of <i>distal</i> - <b>1</b>                                             | S16 |
| Figure S18— <sup>1</sup> H/ <sup>1</sup> H COSY NMR spectrum of <i>distal</i> - <b>1</b>                                          | S17 |

|                                                                                                                       |     |
|-----------------------------------------------------------------------------------------------------------------------|-----|
| Figure S19— $^1\text{H}/^{13}\text{C}$ HSQC NMR spectrum of <i>distal-1</i>                                           | S17 |
| Figure S20— $^1\text{H}/^{13}\text{C}$ HMBC NMR spectrum of <i>distal-1</i>                                           | S17 |
| <i>ESI-MS spectra</i>                                                                                                 |     |
| Figure S21—ESI-MS spectrum of <i>proximal</i> -[Ru(C <sub>2</sub> tpy)(C <sub>2</sub> pyqu)Cl]Cl                      | S18 |
| Figure S22—ESI-MS spectrum of <i>proximal-1</i>                                                                       | S18 |
| Figure S23—ESI-MS spectrum of <i>distal-1</i>                                                                         | S19 |
| <i>Absorption spectra</i>                                                                                             |     |
| Figure S24—Absorption spectra of <i>proximal</i> - and <i>distal-1</i>                                                | S20 |
| Figure S25—Absorption spectra of <i>proximal-1</i> during titration experiments                                       | S20 |
| Figure S26—Absorption spectra of <i>distal-1</i> during titration experiments                                         | S21 |
| <i>Additional figures for photo- and thermal-isomerizations</i>                                                       |     |
| Figure S27—Excitation wavelength dependency of photoisomerization                                                     | S22 |
| Figure S28—Thermal isomerization of <i>distal-1</i> at room temperature                                               | S23 |
| Figure S29—Eyring plots for thermal isomerization reactions                                                           | S24 |
| Figure S30—van't Hoff plots for thermal isomerization reactions                                                       | S24 |
| Table S1— Summary of photoisomerization and thermal isomerization parameters                                          | S25 |
| <i>Additional figures for water oxidation experiments</i>                                                             |     |
| Figure S31—Catalytic O <sub>2</sub> evolution measured with a Clark electrode                                         | S26 |
| Figure S32—Plots of initial rate of O <sub>2</sub> evolution vs the amounts of complexes                              | S26 |
| Figure S33— Catalytic O <sub>2</sub> evolution measured with gas chromatography                                       | S27 |
| <i>Electrochemical measurements</i>                                                                                   |     |
| Figure S34—Cyclic voltammograms of <i>proximal</i> - and <i>distal-1</i>                                              | S28 |
| Figure S35—Cyclic voltammograms of <i>proximal</i> - and <i>distal-1</i>                                              | S28 |
| <i>Crystallographic information</i>                                                                                   |     |
| Table S2—Crystal and Refinement Data for <i>proximal</i> - and <i>distal-1</i>                                        | S29 |
| Table S3—Summary of bond lengths and angles of <i>proximal</i> - and <i>distal-1</i>                                  | S30 |
| <i>DFT calculations</i>                                                                                               |     |
| Figure S36—Optimized structures of <i>proximal</i> - and <i>distal-1</i>                                              | S31 |
| Figure S37—Energy diagrams for water nucleophilic attack                                                              | S32 |
| Figure S38—LUMOs of <i>proximal</i> - and <i>distal</i> -[Ru(C <sub>2</sub> tpy)(C <sub>2</sub> pq)O] <sup>3+</sup> . | S33 |
| Cartesian coordinates and energies                                                                                    | S34 |
| <i>References</i>                                                                                                     | S42 |

## Experimental Details

### General considerations

#### Materials.

4'-ethoxy-2,2';6',2''-terpyridine (C<sub>2</sub>tpy),<sup>1</sup> Ru(C<sub>2</sub>tpy)Cl<sub>3</sub>,<sup>2</sup> and 2-(2'-(6'-chloro)-pyridyl)quinoline<sup>3</sup> were prepared as previously described. Silica-gel column chromatography was performed using silica gel 60 (Kanto Chemical Co., Inc., 100-210 μm). Triflic acid was distilled under reduced pressure at 70 °C, and then diluted to 1 M with distilled water right after the distillation. 2,2,2-trifluoroethanol was dried over with 4Å molecular sieves, and then distilled under nitrogen. All other reagents were purchased and used without further purification.

#### Measurements

<sup>1</sup>H NMR spectra were recorded on a JEOL 500 MHz spectrometer. <sup>1</sup>H NMR spectra were referenced using tetramethylsilane in organic solvents or sodium 3-(trimethylsilyl)propionate-2,2,3,3-*d*<sub>4</sub> in D<sub>2</sub>O as internal standard reagents. UV visible absorption spectra were measured in a quartz cell with 1 cm of a light path length using a photodiode array spectrometer (Hitachi U-3310). For the determination of quantum yield of photoisomerization of *proximal-1* or *distal-1*, the ruthenium complex was dissolved in CD<sub>3</sub>OD (20%) and D<sub>2</sub>O (80%) and transferred to an NMR tube, where the concentration of the complex and volume of the sample solution were 2 mM and 500 μL, respectively. The sidewall of the NMR tube was irradiated monochromic light (λ = 509 ± 1.5 nm, 1.6 mW cm<sup>-2</sup>) at room temperature. The internal quantum yields for photosubstitution were given from the

$$\Phi = \frac{hcN_Akn_{int}}{p\lambda A(1 - T)}$$

where *k*, *n*<sub>int</sub>, *h*, *p*, λ, *c*, *N*<sub>A</sub>, *T* and *A* are the initial rate constant for photosubstitution, initial amount of ruthenium complexes (1 × 10<sup>-6</sup> mol), Plank's constant, photon flux (1.6 mW cm<sup>-2</sup>), wavelength (5.09 × 10<sup>-7</sup> m), the speed of light, Avogadro's number, the transmittance, and the irradiated area (1.2 cm<sup>2</sup>), respectively. The transmittance of light can be regarded as zero because of large extinction coefficients of complexes at the wavelength (~9 × 10<sup>3</sup> M<sup>-1</sup> cm<sup>-1</sup>) and high concentration of sample (2 mM). The initial rate constants were determined from the slope of concentration change and irradiation time. NMR spectra

were processed with MNova software. Electrospray ionization mass spectra (ESI MS) were measured with a Waters/Micromass, ZQ 4000 spectrometer. The conditions were as follows: complex concentration, 5 – 40  $\mu\text{M}$  in methanol; cone voltage, 20 V; capillary voltage, 3.5 kV. X-ray diffraction data were recorded using a Bruker APEXII CCD area detector diffractometer; the detector was positioned at a distance of 6.0 cm from the crystal and monochromated Mo  $K\alpha$  radiation ( $\lambda = 0.71073 \text{ \AA}$ ) from a rotating anode with a mirror focusing apparatus operated at 1.2 kW (50 kV, 24 mA) was used. A sample crystal was mounted on a glass fiber for X-ray diffraction measurements. The structures were solved by direct methods and expanded using Fourier techniques. The non-hydrogen atoms were refined anisotropically. Hydrogen atoms on bidentate and tridentate ligands were included but not refined. The final cycle of full-matrix least-squares refinement was based on the observed reflections [ $I > 2.00 \sigma(I)$ ] and variable parameters, and converged with unweighted and weighted agreement factors  $R$  and  $R_w$ . The crystal structure was refined with Olex2 software and ORTEP views were plotted with ORTEP3. The electrochemical measurement was performed in a conventional single-compartment cell equipped with a glassy carbon electrode (effective area,  $0.071 \text{ cm}^2$ ) as an working electrode, a saturated calomel electrode (SCE) as an reference electrode, and a platinum wire counter electrode at  $25^\circ\text{C}$  using an electrochemical analyzer (Hokuto Denko, HZ-3000). The glassy carbon working electrode was polished with polycrystalline diamonds (Struers, DP-Paste P,  $1/4 \mu\text{m}$ ) and rinsed with water and acetone prior to use.

### Water oxidation experiments

To a 20 mL vial equipped with a rubber septum were added ruthenium complexes, 20  $\mu\text{L}$  of 2,2,2-trifluoroethanol, and then distilled water (1.5 ml). To the other vial equipped with a rubber septum and a magnetic stir bar were added ceric ammonium nitrate (0.75 mmol) and 0.1 M triflic acid (pH = 1.0, 13.5 ml). The two vials were connected with Teflon tube and then bubbled with argon gas for 30 minutes prior to the experiments. After the bubbling, the solution of the catalyst was transferred to the vial containing  $\text{Ce}^{\text{IV}}$  solution via a Teflon tube with argon pressure. The evolved oxygen gas in the headspace was collected using a microsyringe (Ito Seisakusho, MS-R100). The sample gas was analyzed on a gas chromatograph (Shimadzu, GC-2014) equipped with a molecular sieve 5  $\text{\AA}$  column using argon carrier gas (flow rate is  $25 \text{ mL min}^{-1}$ ) at  $40^\circ\text{C}$  and a TCD detector. The chromatogram was analyzed with Chromatopac (Shimadzu, C-R8A). For the measurement of oxygen gas in liquid phase, Clark type oxygen electrode (Hansatech Instruments, Oxygraph OXYG1 and DW1/AD unit) was used. For the oxygen evolution after light irradiation, the bottom of the vial containing ruthenium complex in water and trifluoroethanol was irradiated with halogen lamp ( $\lambda > 340 \text{ nm}$ ) for 3h at room temperature.

### **DFT calculations**

DFT calculations were performed using the Gaussian 16 package of programs.<sup>4</sup> Molecular structures were fully optimized using the B3LYP or UB3LYP method, which uses the hybrid Becke's three-parameter exchange functional<sup>5</sup> with the correlation energy functional of Lee, Yang, and Parr.<sup>6</sup> Calculations were performed using the standard double- $\zeta$ -type LanL2DZ basis set for Ru and 6-31G(d) for non-metal atoms. Molecular orbitals were visualized GaussView 6. The percentage contribution of groups to the molecular orbitals were calculated using GasussSum 3.0.<sup>7</sup>

## Syntheses.

**2-[2'-(6'-ethoxy)-pyridyl]quinoline (C<sub>2</sub>pq):** To a 300 mL round bottom flask equipped with a stir bar were added 2-[2'-(6'-chloro)-pyridyl]quinoline (540 mg, 2.24 mmol), NaOH (8 g, 0.2 mol), ethanol (100 mL). The reaction mixture was refluxed for 24 h, allowed to cool at room temperature, and evaporated to *ca.* 20 mL. An excess amount of water (100 mL) was added to the ethanol solution. The yellow precipitate was collected by filtration and dried under vacuum. The crude product was recrystallized from a mixed solution of water and ethanol. The colorless precipitate was collected and dried under vacuum. Yield 474 mg (84.5 %). Anal. calcd. for H<sub>14</sub>C<sub>16</sub>N<sub>2</sub>O: C, 76.78; H, 5.64; N, 11.19. Found: C, 76.80; H, 5.57, N, 11.43. <sup>1</sup>H NMR (500.16 MHz, CDCl<sub>3</sub>) δ 8.55 (d, *J* = 8.6 Hz, 1H), 8.37 – 8.12 (m, 3H), 7.85 (d, *J* = 8.2 Hz, 1H), 7.81 – 7.68 (m, 2H), 7.62 – 7.50 (m, 1H), 6.82 (d, *J* = 8.2 Hz, 1H), 4.55 (q, *J* = 7.1 Hz, 2H), 1.49 (t, *J* = 7.1 Hz, 3H). <sup>13</sup>C NMR (125.75 MHz, CDCl<sub>3</sub>) δ 163.4, 156.2, 153.3, 147.6, 139.6, 137.0, 129.8, 129.6, 128.3, 127.7, 126.8, 119.2, 114.7, 111.74, 77.37, 77.12, 61.8, 14.8.

**Proximal-[Ru(C<sub>2</sub>tpy)(C<sub>2</sub>pq)Cl]Cl:** To a 200 mL round bottom flask equipped with a stir bar were added Ru(C<sub>2</sub>tpy)Cl<sub>3</sub> (199 mg, 0.41 mmol), C<sub>2</sub>pq (98 mg, 0.39 mmol), triethylamine (1.0 mL), LiCl (300 mg), and 1-propanol (50 mL). The reaction mixture was refluxed under nitrogen for a week followed by evaporation to dryness under reduced pressure at 45°C. The solid was suspended in chloroform and filtered through Celite. The filtrate was concentrated to ~10 mL by a rotary evaporator and an excess amount of ether (~100 mL) was added. The crude product was filtered and washed with 3 M HCl and ether. The solid was purified silica gel chromatography. The dark brown impurities were eluted with chloroform. The purple colored product was eluted with 4% methanol in chloroform. Yield 107 mg (33 %). Anal. calcd. for *proximal*-[Ru(C<sub>2</sub>tpy)(C<sub>2</sub>pq)Cl]Cl·3HCl·H<sub>2</sub>O, H<sub>34</sub>C<sub>33</sub>N<sub>5</sub>O<sub>3</sub>Cl<sub>3</sub>Ru<sub>1</sub>: C, 47.93; H, 4.14; N, 8.47. Found: C, 47.84; H, 4.18, N, 8.67. <sup>1</sup>H NMR (500.16 MHz, CDCl<sub>3</sub>) 9.58 (d, *J* = 8.4 Hz, 1H), 8.56 (s broad, 2H), 8.35 – 8.00 (m, 4H), 7.97 – 7.50 (m, 9H), 7.12 (s broad, 2H), 6.54 (s broad, 1H), 4.42 (s broad, 2H), 3.67 (s broad, 2H), 1.54 (s broad, 3H), 0.79 (s broad, 3H). Peaks were significantly broadened, which was also observed in higher temperature (45°C). <sup>13</sup>C NMR (125.75 MHz, CDCl<sub>3</sub>) δ 169.7, 165.4, 160.2, 159.3, 158.9, 158.2, 153.0, 151.4, 139.9, 137.8, 137.0, 131.2, 131.1, 129.3, 129.0, 128.4, 127.0, 123.8, 119.9, 119.1, 109.8, 107.8, 66.9, 66.4, 14.8, 14.1. ESI MS of *proximal*-[Ru(C<sub>2</sub>tpy)(C<sub>2</sub>pyqu)Cl]Cl (solvent: methanol) *m/z* (calcd): 314.62 (314.57, [M – H<sub>2</sub>O – 2Cl]<sup>2+</sup>).

**Proximal-[1](OTf)<sub>2</sub>**: To a 50 mL round bottom flask were added *proximal*-[Ru(C<sub>2</sub>tpy)(C<sub>2</sub>pq)Cl]Cl (50 mg, 60 μmol), silver triflate (30 mg, 117 μmol), acetone (3 mL), and water (10 mL). The reaction mixture was refluxed in the dark for 2h and filtered through Celite. Lithium triflate (300 mg) was added to the filtrate and the red-colored solution was evaporated to *ca.* 3 mL under reduced pressure at 45°C. The dark-red solid was collected on frit, washed with water (~0.5 mL), and dried in vacuum. Yield: 36 mg (62 %). Anal. calcd. for *proximal*-[1](OTf)<sub>2</sub>·H<sub>2</sub>O, H<sub>33</sub>C<sub>35</sub>N<sub>5</sub>O<sub>10</sub>F<sub>6</sub>S<sub>2</sub>Ru: C, 43.66; H, 3.45; N, 7.27. Found: C, 43.63; H, 3.22, N, 7.45. <sup>1</sup>H NMR (500.16 MHz, 20% CD<sub>3</sub>OD and 80% D<sub>2</sub>O) δ 8.58 (d, *J* = 8.8 Hz, 1H, quinoline-*H*), 8.53 – 8.49 (m, 1H, quinoline-*H*), 8.47 (d, *J* = 8.8 Hz, 1H, quinoline-*H*) 8.23 (d, *J* = 8.1 Hz, 2H, tpy-*H*), 8.13 – 8.07 (m, 1H, quinoline-*H*), 8.04 – 7.94 (m, 3H, tpy-*H* and pyridine-*H*), 7.76 (td, *J* = 7.9, 1.5 Hz, 2H, tpy-*H*), 7.68 – 7.64 (m, 2H, quinoline-*H*), 7.60 – 7.52 (m, 3H, tpy-*H* and pyridine-*H*), 7.09 (ddd, *J* = 7.3, 5.6, 1.3 Hz, 2H, tpy-*H*), 6.43 (d, *J* = 8.5 Hz, 1H, pyridine-*H*), 4.36 (q, *J* = 7.0 Hz, 2H, tpy-CH<sub>2</sub>), 3.53 (q, *J* = 7.0 Hz, 2H, pyqu-CH<sub>2</sub>), 1.40 (t, *J* = 7.0 Hz, 3H, tpy-CH<sub>3</sub>), 0.61 (t, *J* = 7.0 Hz, 3H, pyqu-CH<sub>3</sub>). <sup>13</sup>C NMR (125.75 MHz, 20% CD<sub>3</sub>OD and 80% D<sub>2</sub>O) δ 169.8 (pyridine-*C*), 166.1 (tpy-*C*), 160.0 (tpy-*C*), 159.6 (tpy-*C*), 158.9 (pyridine-*C*), 158.4 (quinoline-*C*), 153.6 (tpy-*C*), 150.6 (quinoline-*C*), 139.1 (pyridine-*C*), 137.9 (tpy-*C*), 137.7 (quinoline-*C*), 131.4 (quinoline-*C*), 129.2 (quinoline-*C*), 129.0 (quinoline-*C*), 128.8 (quinoline-*C*), 127.3 (tpy-*C*), 127.1 (quinoline-*C*), 123.3 (tpy-*C*), 119.5 (quinoline-*C*), 118.2 (pyridine-*C*), 109.9 (tpy-*C*), 107.1 (pyridine-*C*), 65.9 (tpy-CH<sub>2</sub>), 65.4 (pyqu-CH<sub>2</sub>), 13.7 (tpy-CH<sub>3</sub>), 12.7. (pyqu-CH<sub>3</sub>). <sup>1</sup>H NMR spectrum of *proximal*-[1]Cl<sub>2</sub> where the sample was obtained by dissolving the *proximal*-[(C<sub>2</sub>tpy)(C<sub>2</sub>pyqu)Cl]Cl in D<sub>2</sub>O showed same peaks as isolated *proximal*-[1](OTf)<sub>2</sub>. ESI MS of *proximal*-[1](OTf)<sub>2</sub> (solvent: methanol) *m/z* (calcd): 314.67 (314.57, [M – H<sub>2</sub>O – 2OTf]<sup>2+</sup>). UV-vis: λ/ nm (ε/ 10<sup>3</sup> mol<sup>-1</sup> L cm<sup>-1</sup>) in H<sub>2</sub>O, 250 (38.6), 310 (37.2), 520 (9.6).

**Distal-[1](OTf)<sub>2</sub>**: To a 300 mL tall beaker were added *proximal*-[Ru(C<sub>2</sub>tpy)(C<sub>2</sub>pq)Cl]Cl (52 mg, 62 μmol), acetone (10 mL), and water (60 mL). The reddish colored solution was illuminated with halogen lamp (120 mW cm<sup>-2</sup>) for overnight at room temperature. To a 200 mL round bottom flask were added the reaction mixture and lithium triflate (~2 g) and then the mixture was filtered through Celite. The filtrate was evaporated with rotary evaporator (25 °C, 41 mmHg) under illumination with halogen lamp for 2 days. During the evaporation, large crystals (~0.3 mm) of *distal*-**1** were selectively obtained and used for X-ray crystallography. Yield 29 mg (48 %). Anal. calcd. for *distal*-[1]·(OTf)<sub>2</sub>·2H<sub>2</sub>O, H<sub>35</sub>C<sub>35</sub>N<sub>5</sub>O<sub>11</sub>F<sub>6</sub>S<sub>2</sub>Ru: C, 42.86; H, 3.60; N, 7.14. Found: C, 42.64; H, 3.51, N, 7.17. <sup>1</sup>H NMR (500.16 MHz, 20% CD<sub>3</sub>OD and 80% D<sub>2</sub>O) δ 8.32 (d, *J* = 7.8 Hz, 1H, pyridine-*H*), 8.22 (t, *J* = 8.2 Hz, 1H,

pyridine-*H*), 8.17 (d,  $J = 8.2$  Hz, 3H, tpy-*H* and quinoline-*H*), 8.01 (s, 2H, tpy-*H*), 7.94 (d,  $J = 8.7$  Hz, 1H, quinoline-*H*), 7.84 (d,  $J = 5.5$  Hz, 2H, tpy-*H*), 7.75 (t,  $J = 7.9$  Hz, 2H, tpy-*H*), 7.54 (d,  $J = 8.0$  Hz, 1H, quinoline-*H*), 7.40 (d,  $J = 8.5$  Hz, 1H, pyridine-*H*), 7.21 (t,  $J = 7.3$  Hz, 1H, quinoline-*H*), 7.17 (t,  $J = 6.8$  Hz, 2H, tpy-*H*), 7.06 (t,  $J = 8.1$  Hz, 1H, quinoline-*H*), 6.72 (d,  $J = 8.9$  Hz, 1H, quinoline-*H*), 4.36 (q,  $J = 7.0$  Hz, 4H, tpy- $\text{CH}_2$  and pyridine- $\text{CH}_2$ ), 1.40 (t,  $J = 6.9$  Hz, 3H,  $-\text{CH}_3$ ), 1.13 (t,  $J = 7.0$  Hz, 3H,  $-\text{CH}_3$ ).  $^{13}\text{C}$  NMR (125.75 MHz, 20%  $\text{CD}_3\text{OD}$  and 80%  $\text{D}_2\text{O}$ )  $\delta$  169.2 (pyridine-*C*), 166.5 (tpy-*C*), 161.7 (quinoline-*C*), 159.7 (tpy-*C*), 159.2 (tpy-*C*), 156.5 (pyridine-*C*), 153.8 (tpy-*C*), 151.5 (quinoline-*C*), 140.7 (pyridine-*C*), 138.1 (tpy-*C*), 136.8 (quinoline-*C*), 130.6 (quinoline-*C*), 129.1 (quinoline-*C*), 128.1 (quinoline-*C*), 127.9 (quinoline-*C*), 127.5 (tpy-*C*), 124.0 (quinoline-*C*), 123.7 (tpy-*C*), 119.3 (quinoline-*C*), 118.6 (pyridine-*C*), 110.6 (tpy-*C*), 109.1 (pyridine-*C*), 66.5 ( $-\text{CH}_2$ ), 66.0 ( $-\text{CH}_2$ ), 13.62 ( $-\text{CH}_3$ ), 13.40 ( $-\text{CH}_3$ ). ESI MS of *distal*-[1] (OTf)<sub>2</sub> (solvent: methanol)  $m/z$  (calcd): 314.61 (314.57, [M – H<sub>2</sub>O – 2OTf]<sup>2+</sup>). UV-vis:  $\lambda$ / nm ( $\epsilon/ 10^3 \text{ mol}^{-1} \text{ L cm}^{-1}$ ) in H<sub>2</sub>O, 245 (37.9), 274 (28.3), 311 (38.6), 520 (9.4).



## NMR spectra

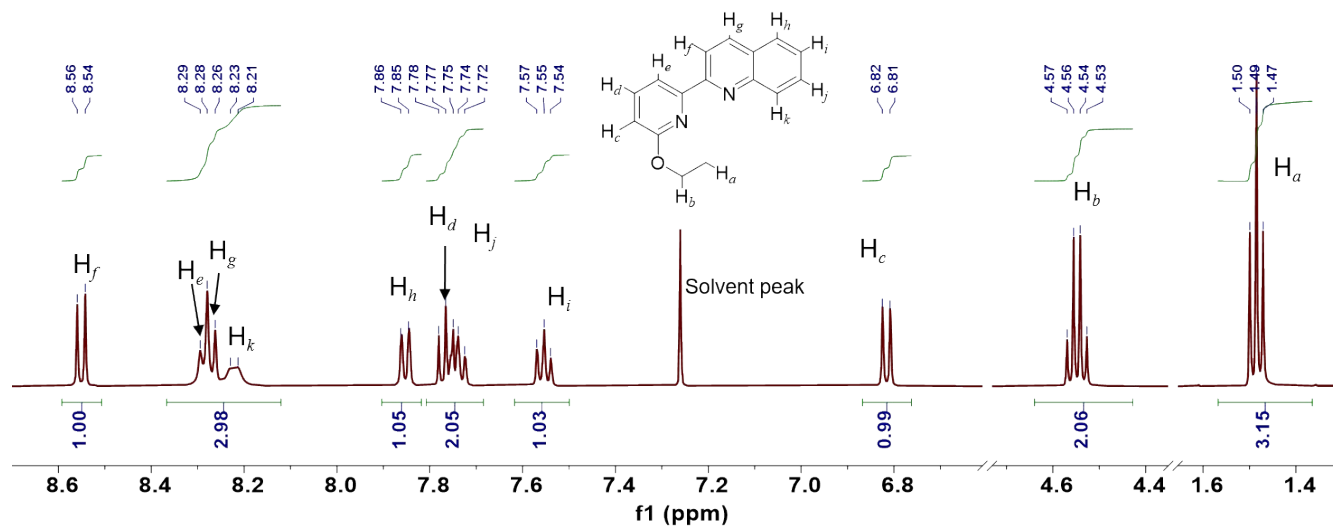

Figure S1. <sup>1</sup>H NMR Spectrum (500.16 MHz, CDCl<sub>3</sub>, 23°C) of C<sub>2</sub>pq.

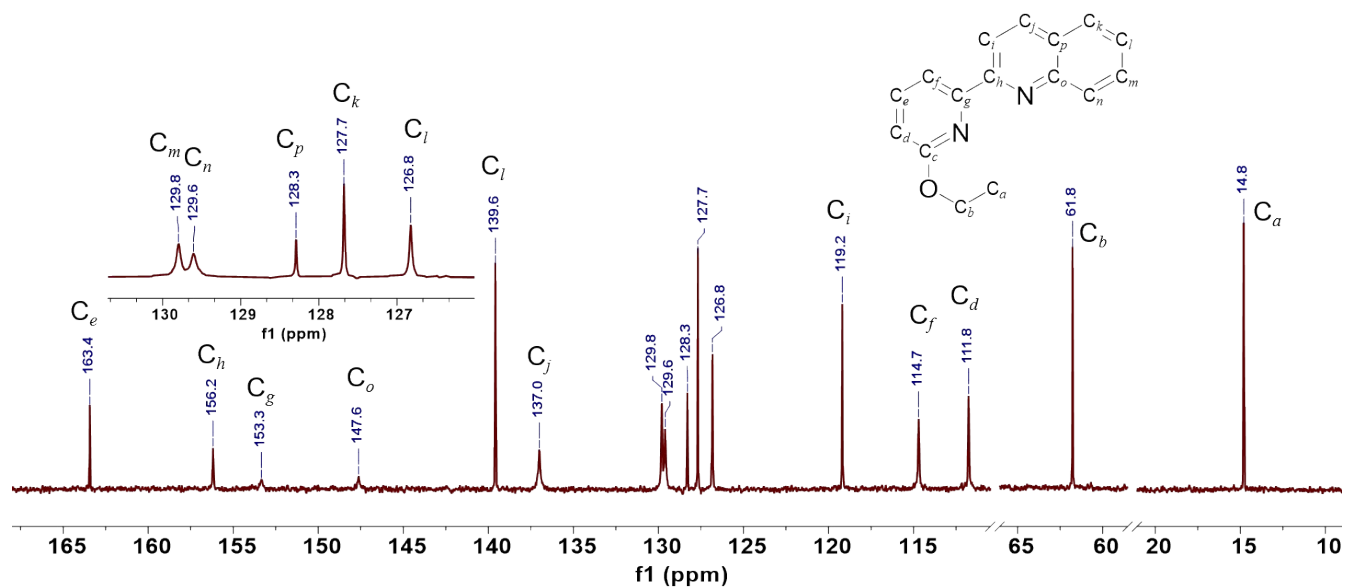

Figure S2. <sup>13</sup>C NMR Spectrum (125.75 MHz, CDCl<sub>3</sub>, 23°C) of C<sub>2</sub>pq.

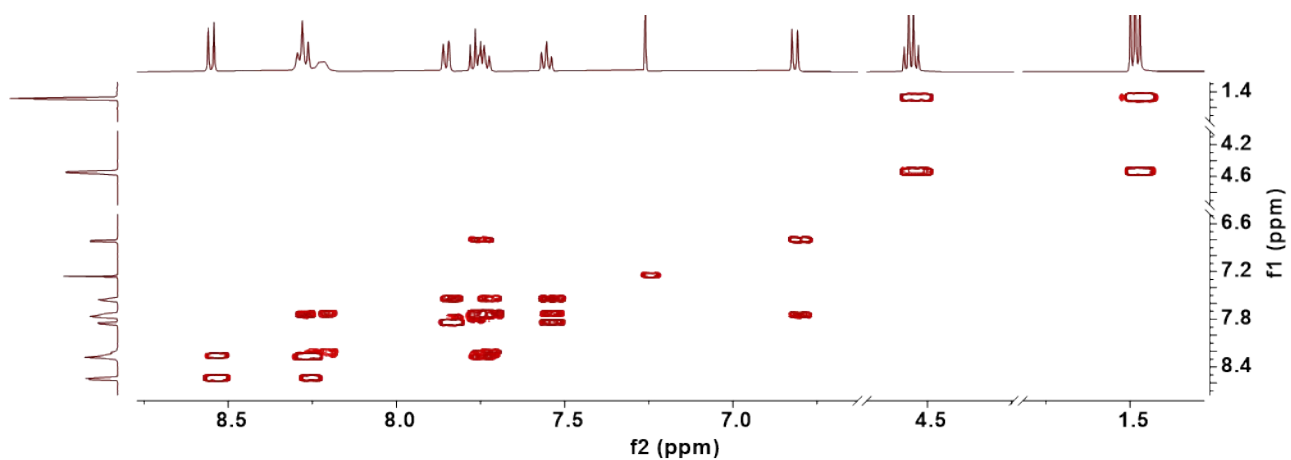

**Figure S3.**  $^1\text{H}/^1\text{H}$  COSY Spectrum (500.16 MHz,  $\text{CDCl}_3$ ,  $23^\circ\text{C}$ ) of  $\text{C}_2\text{pq}$ .

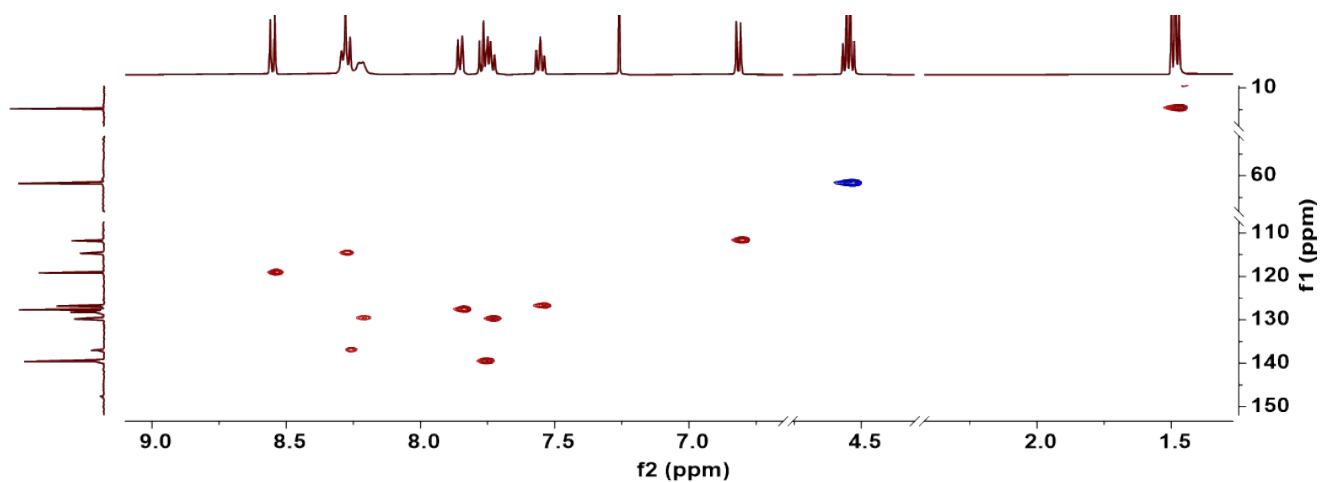

**Figure S4.**  $^1\text{H}/^{13}\text{C}$  HSQC Spectrum (500.16/125.75 MHz,  $\text{CDCl}_3$ ,  $23^\circ\text{C}$ ) of  $\text{C}_2\text{pq}$ .

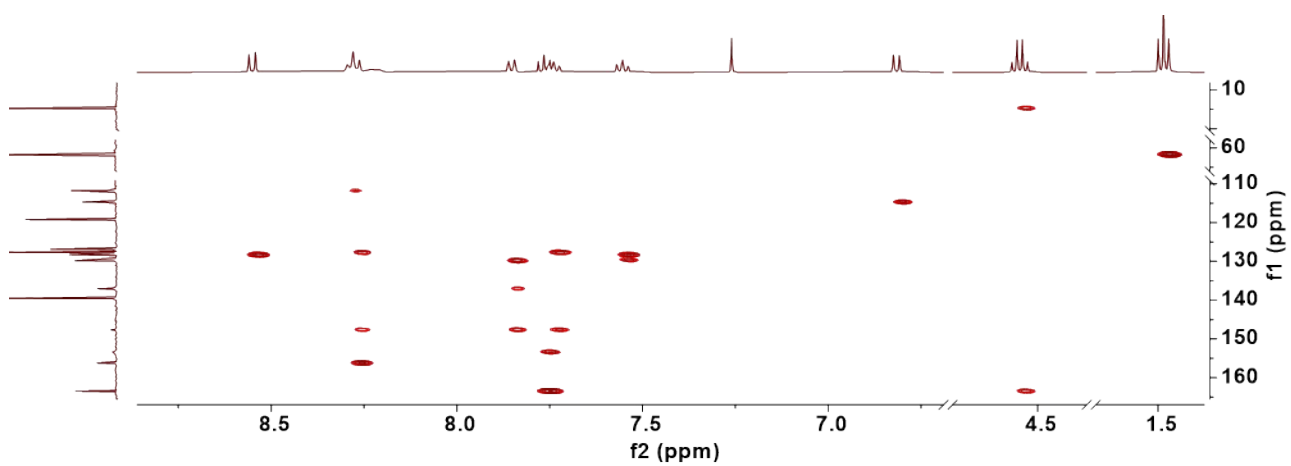

**Figure S5.**  $^1\text{H}/^{13}\text{C}$  HMBC Spectrum (500.16/125.75 MHz,  $\text{CDCl}_3$ ,  $23^\circ\text{C}$ ) of  $\text{C}_2\text{pq}$ .

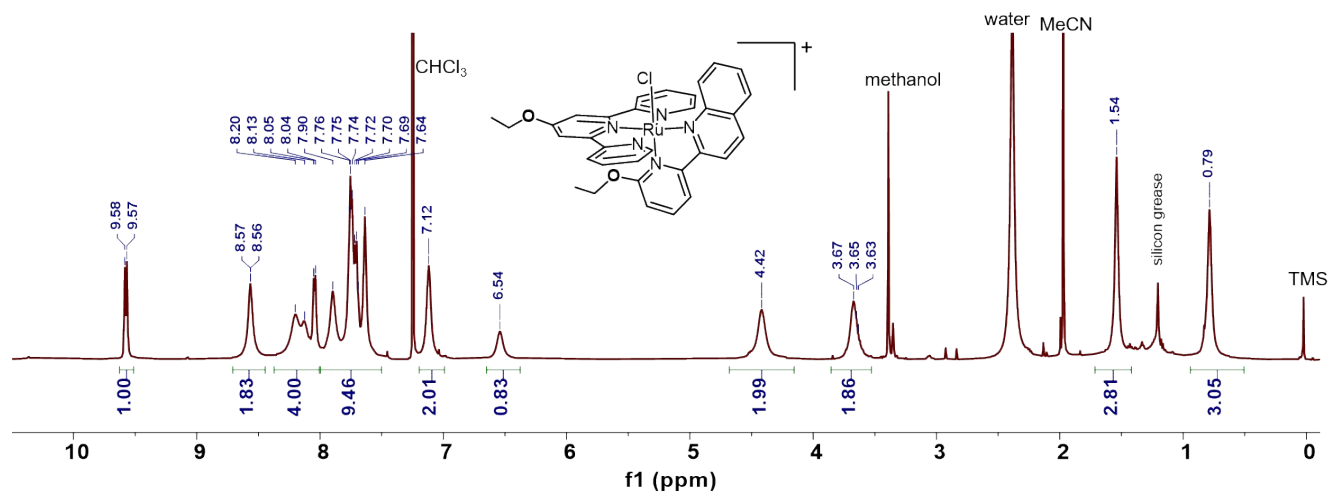

**Figure S6.**  $^1\text{H}$  NMR Spectrum (500.16 MHz,  $\text{CDCl}_3$ ,  $23^\circ\text{C}$ ) of *proximal*- $[(\text{C}_2\text{tpy})(\text{C}_2\text{pq})\text{RuCl}]\text{Cl}$ . Peaks were broadened even at  $45^\circ\text{C}$ .

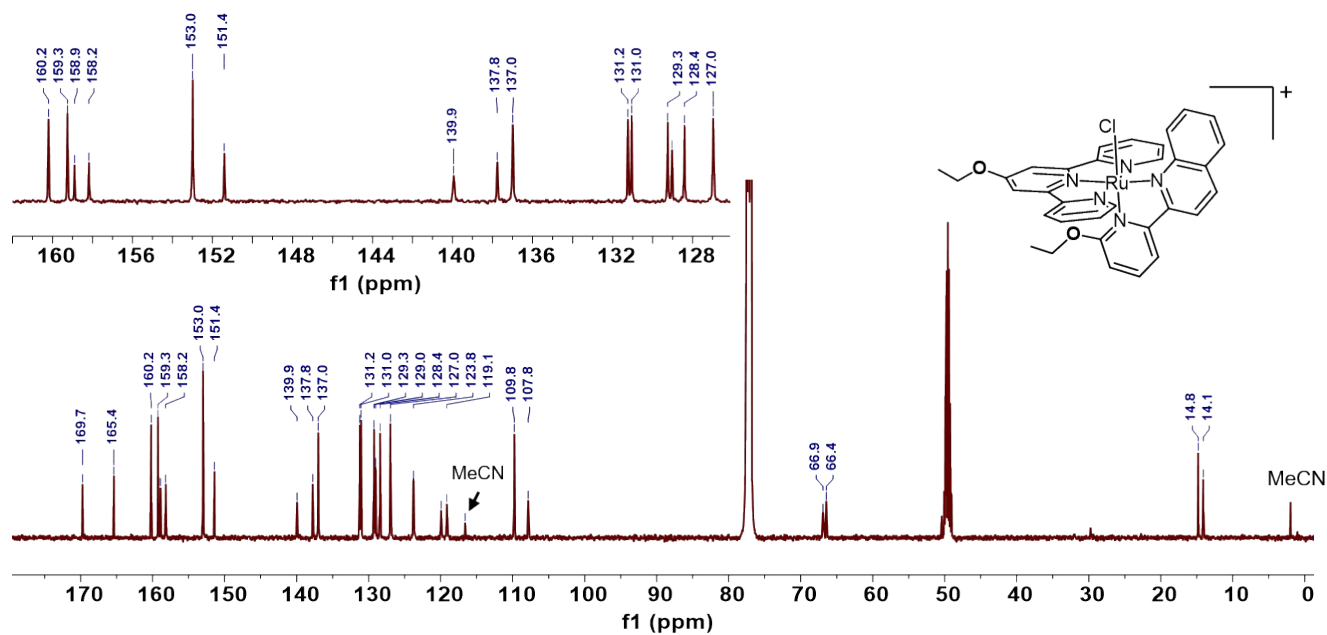

**Figure S7.**  $^{13}\text{C}$  NMR Spectrum (125.75 MHz,  $\text{CDCl}_3$ ,  $23^\circ\text{C}$ ) of *proximal*- $[(\text{C}_2\text{tpy})(\text{C}_2\text{pq})\text{RuCl}]\text{Cl}$ .

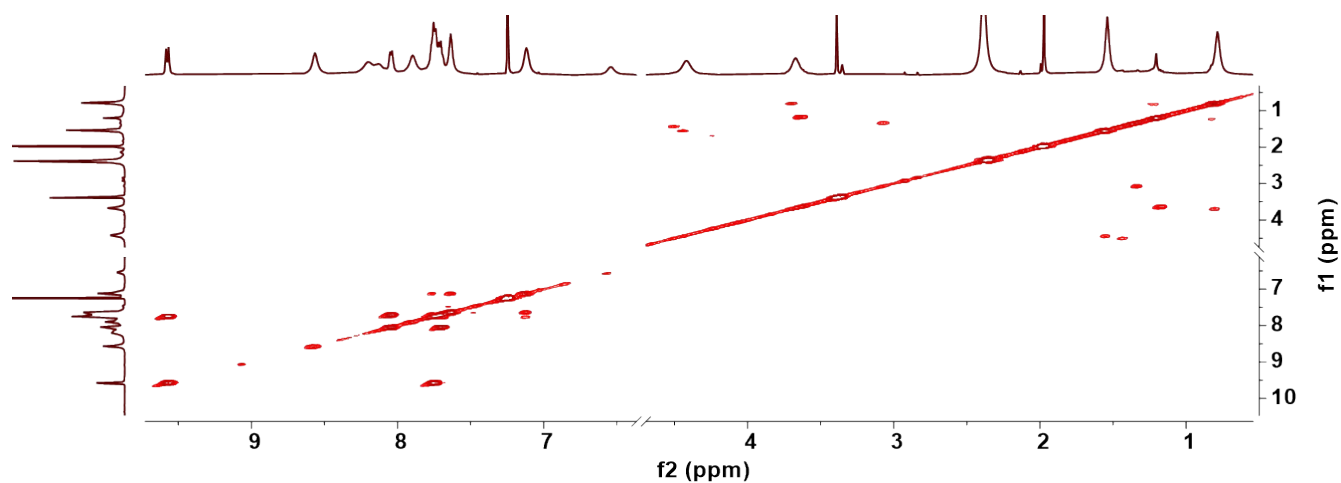

**Figure S8.**  $^1\text{H}/^1\text{H}$  COSY Spectrum (500.16 MHz,  $\text{CDCl}_3$ ,  $23^\circ\text{C}$ ) of *proximal*- $[(\text{C}_2\text{tpy})(\text{C}_2\text{pq})\text{RuCl}]\text{Cl}$ .

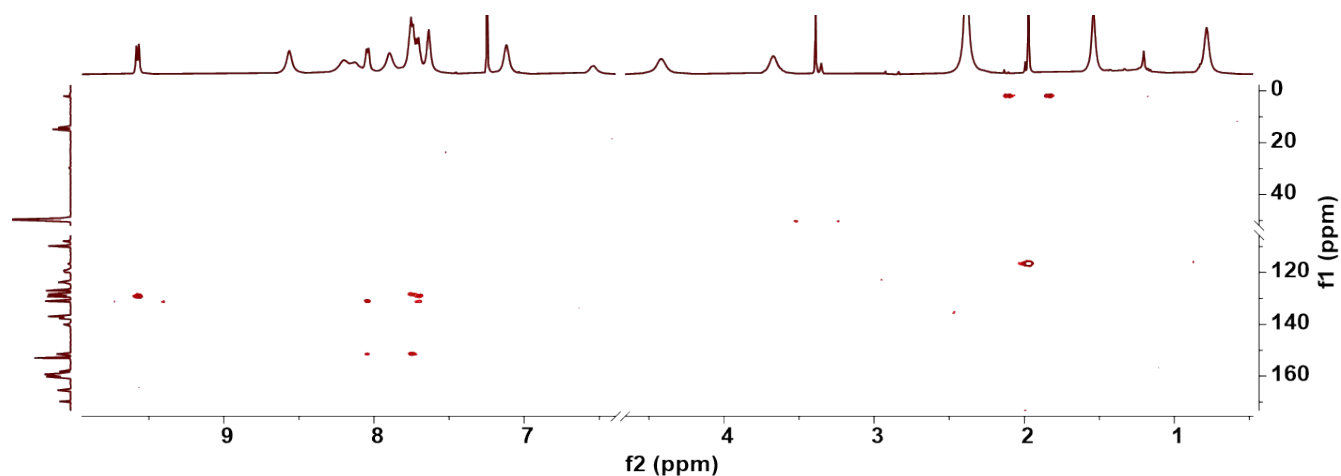

**Figure S9.**  $^1\text{H}/^{13}\text{C}$  HSQC Spectrum (500.16/125.75 MHz,  $\text{CDCl}_3$ ,  $23^\circ\text{C}$ ) of *proximal*- $[(\text{C}_2\text{tpy})(\text{C}_2\text{pq})\text{RuCl}]\text{Cl}$ .

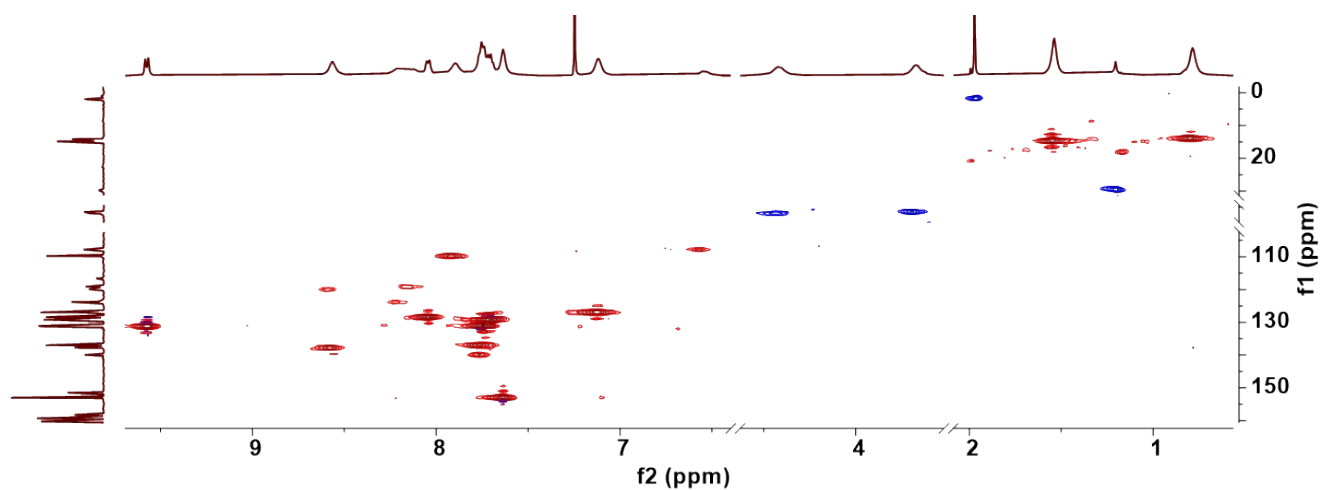

**Figure S10.**  $^1\text{H}/^{13}\text{C}$  HMBC Spectrum (500.16/125.75 MHz,  $\text{CDCl}_3$ ,  $23^\circ\text{C}$ ) of *proximal*- $[(\text{C}_2\text{tpy})(\text{C}_2\text{pq})\text{RuCl}]\text{Cl}$ .

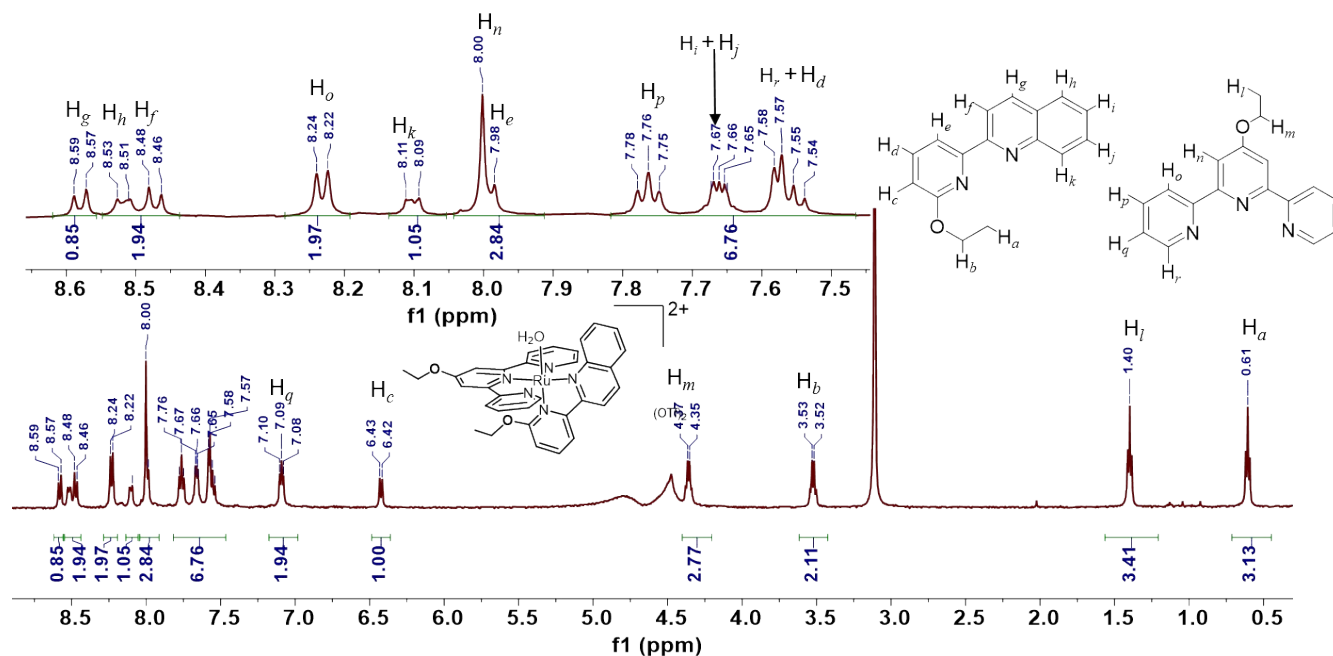

Figure S11.  $^1\text{H}$  NMR Spectrum (500.16 MHz, 80%  $\text{D}_2\text{O}$  and 20%  $\text{CD}_3\text{OD}$ , 23°C) of proximal-[1](OTf) $_2$ .

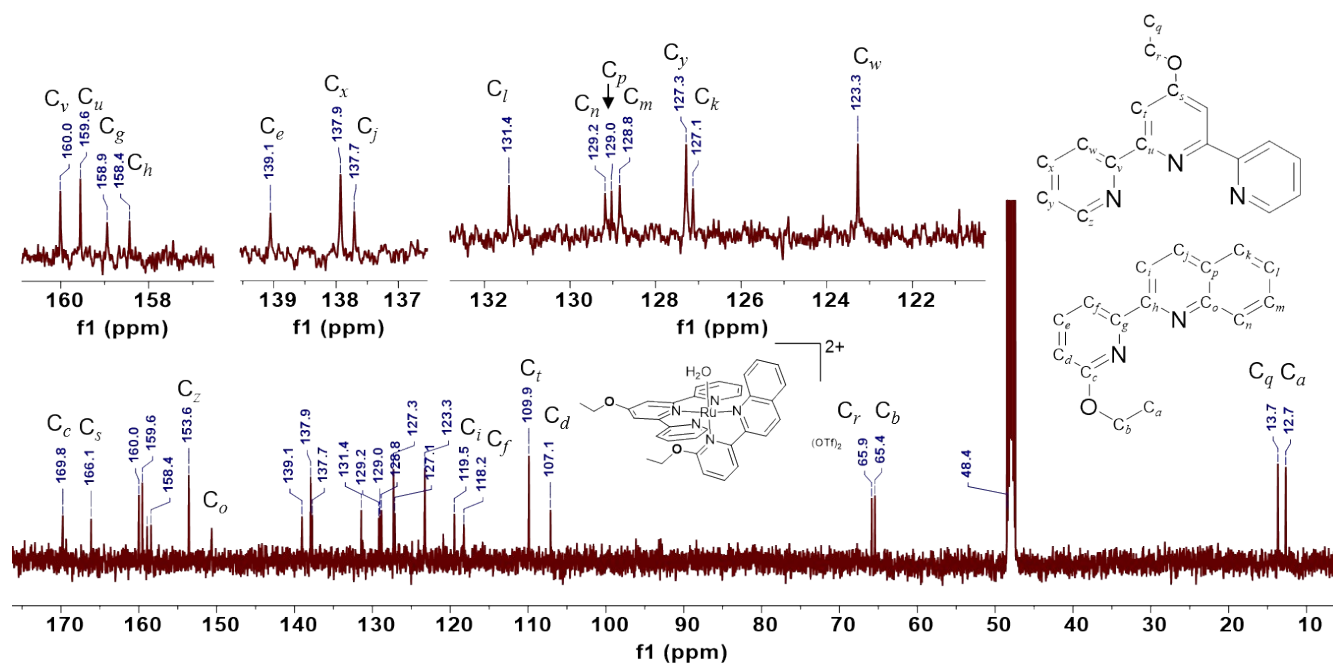

Figure S12.  $^{13}\text{C}$  NMR Spectrum (125.75 MHz, 80%  $\text{D}_2\text{O}$  and 20%  $\text{CD}_3\text{OD}$ , 23°C) of proximal-[1](OTf) $_2$ .

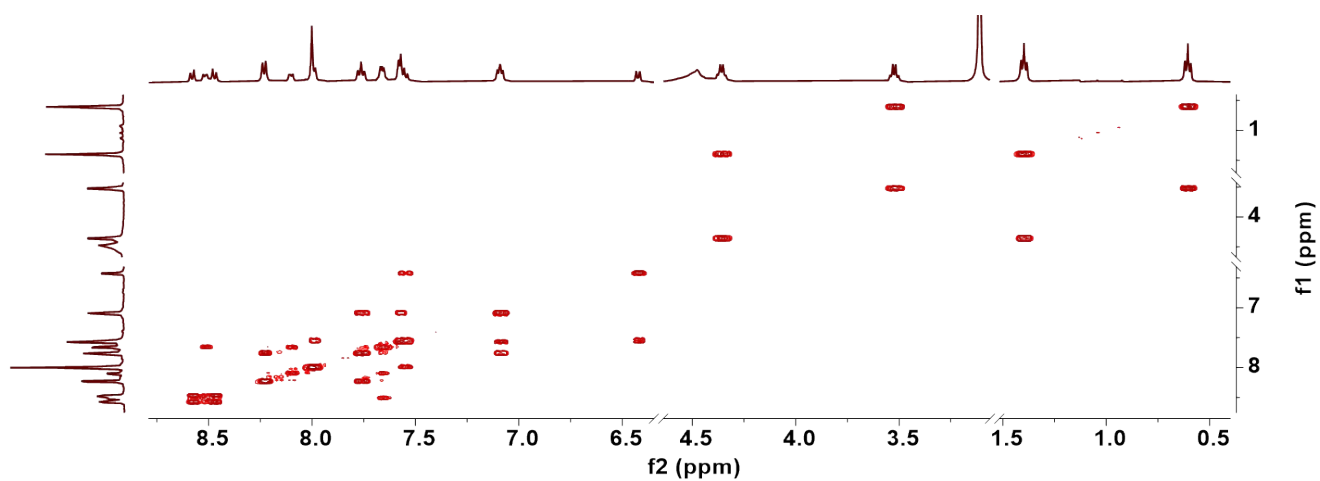

**Figure S13.**  $^1\text{H}/^1\text{H}$  COSY Spectrum (500.16 MHz, 80%  $\text{D}_2\text{O}$  and 20%  $\text{CD}_3\text{OD}$ , 23°C) of *proximal*-[1](OTf)<sub>2</sub>.

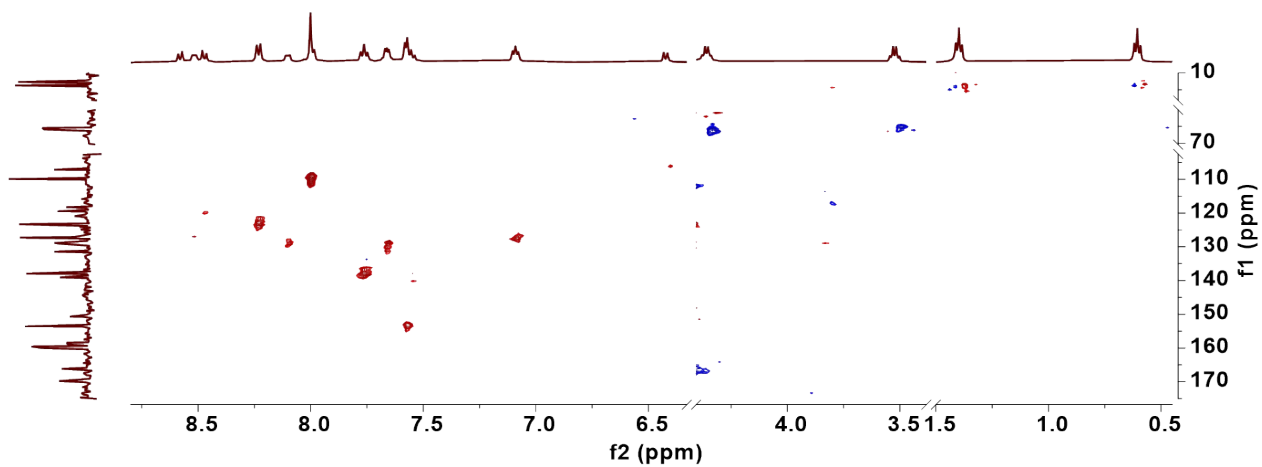

**Figure S14.**  $^1\text{H}/^{13}\text{C}$  HSQC Spectrum (500.16/125.75 MHz,  $\text{D}_2\text{O}$  and 20%  $\text{CD}_3\text{OD}$ , 23°C) of *proximal*-[1](OTf)<sub>2</sub>.

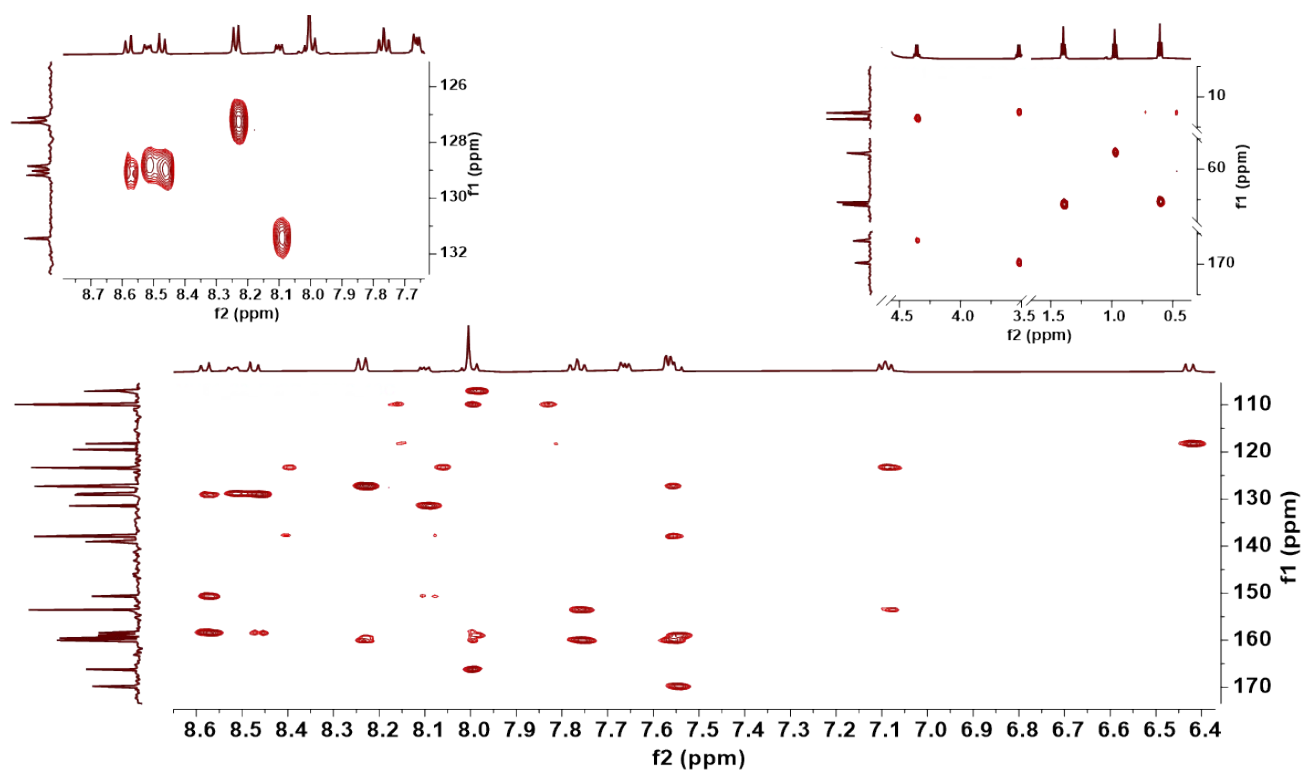

**Figure S15.**  $^1\text{H}/^{13}\text{C}$  HMBC Spectrum (500.16/125.75 MHz, 80%  $\text{D}_2\text{O}$  and 20%  $\text{CD}_3\text{OD}$ , 23°C) of *proximal*-[**1**](OTf)<sub>2</sub>.

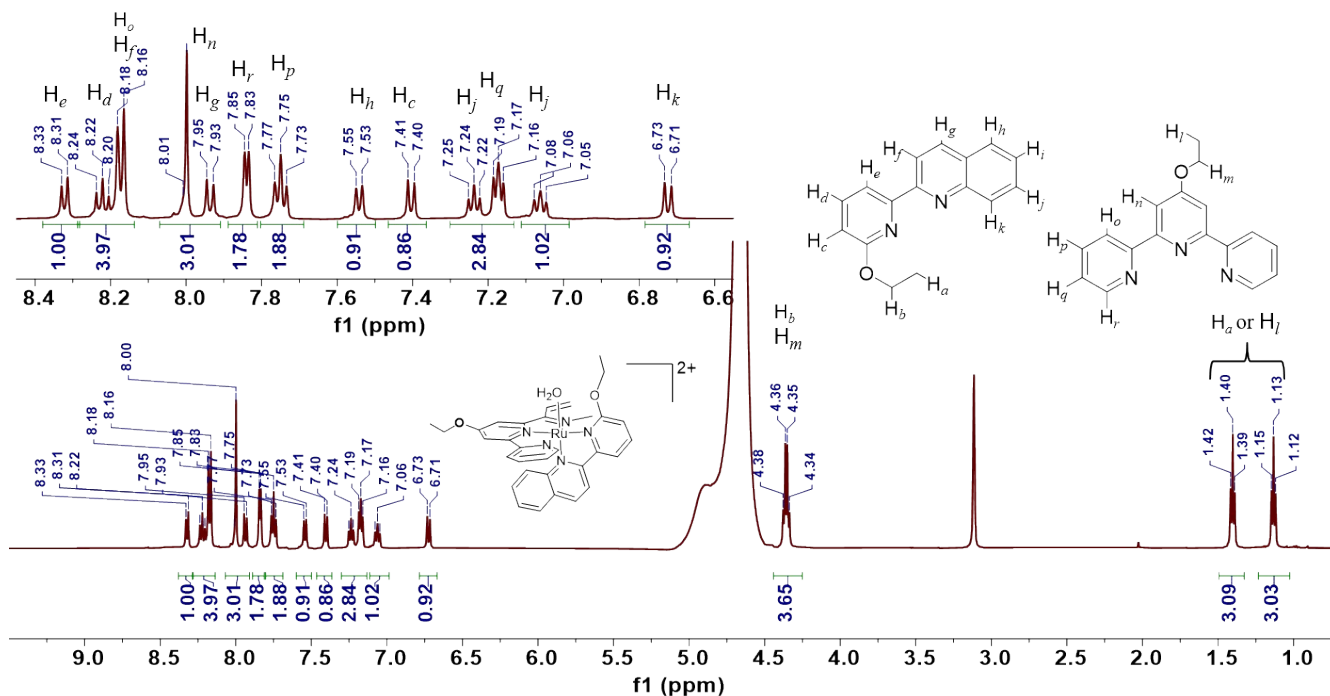

**Figure S16.**  $^1\text{H}$  NMR Spectrum (500.16 MHz, 80%  $\text{D}_2\text{O}$  and 20%  $\text{CD}_3\text{OD}$ , 23°C) of *distal*-[1](OTf) $_2$ .

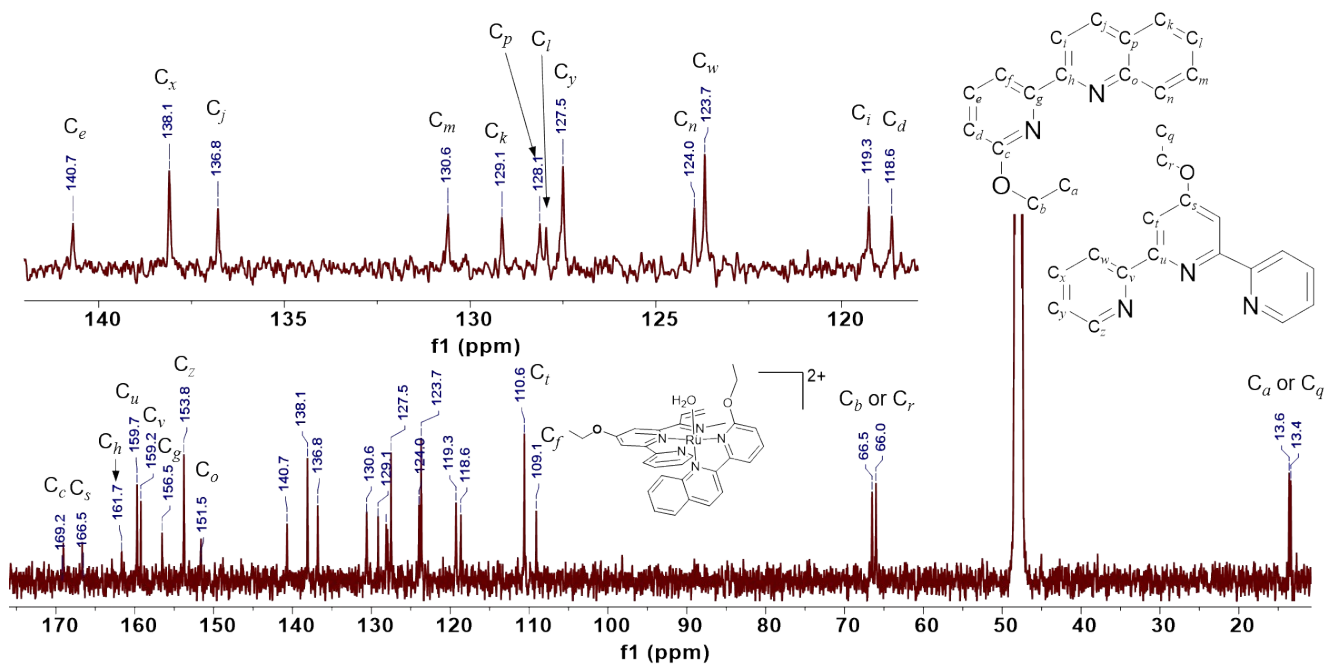

**Figure S17.**  $^{13}\text{C}$  NMR Spectrum (125.75 MHz, 80%  $\text{D}_2\text{O}$  and 20%  $\text{CD}_3\text{OD}$ , 23°C) of *distal*-[1](OTf) $_2$ .



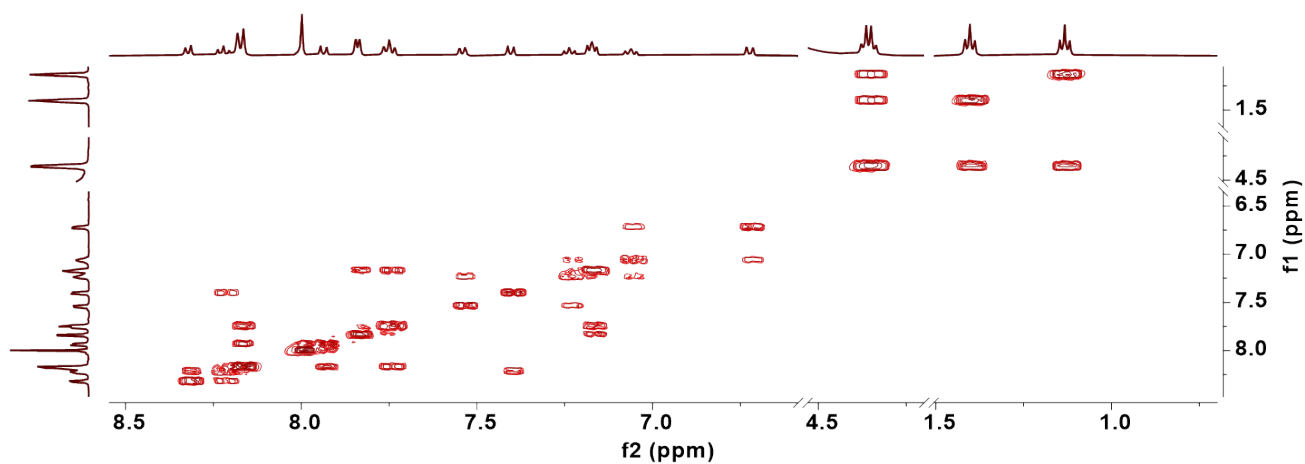

**Figure S18.**  $^1\text{H}/^1\text{H}$  COSY Spectrum (500.16 MHz, 80%  $\text{D}_2\text{O}$  and 20%  $\text{CD}_3\text{OD}$ , 23°C) of *distal*-[1](OTf) $_2$ .

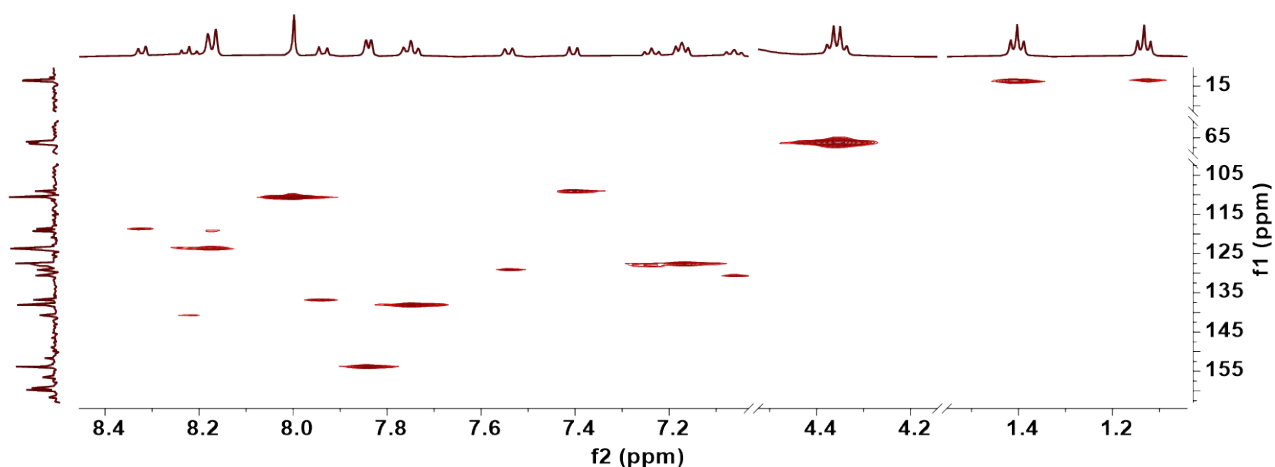

**Figure S19.**  $^1\text{H}/^{13}\text{C}$  HSQC Spectrum (500.16/125.75 MHz,  $\text{D}_2\text{O}$  and 20%  $\text{CD}_3\text{OD}$ , 23°C) of *distal*-[1](OTf) $_2$ .

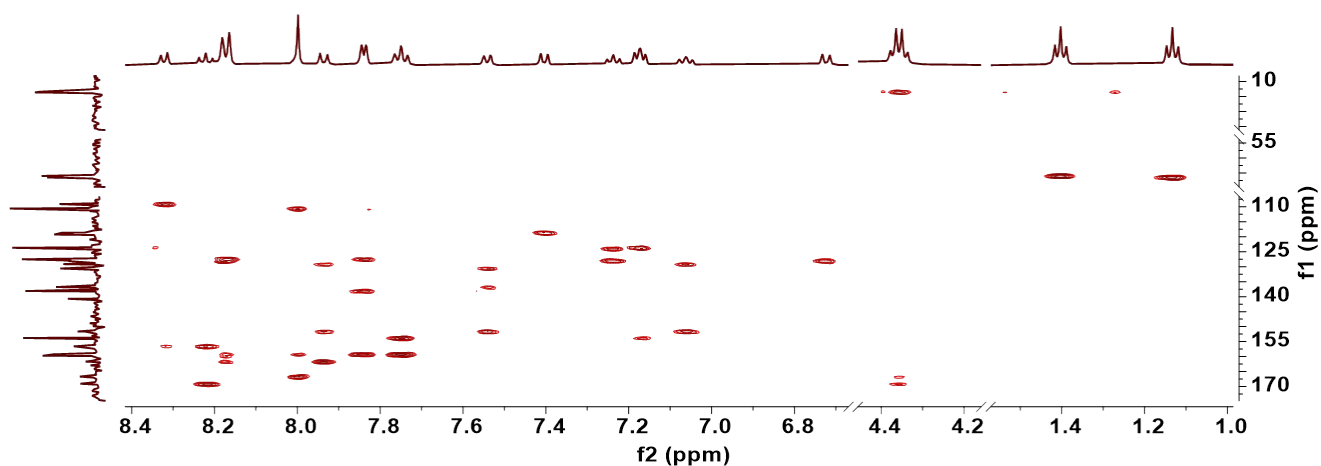

**Figure S20.**  $^1\text{H}/^{13}\text{C}$  HMBC Spectrum (500.16/125.75 MHz,  $\text{D}_2\text{O}$  and 20%  $\text{CD}_3\text{OD}$ , 23°C) of *distal*-[1](OTf) $_2$ .



ESI MS spectra

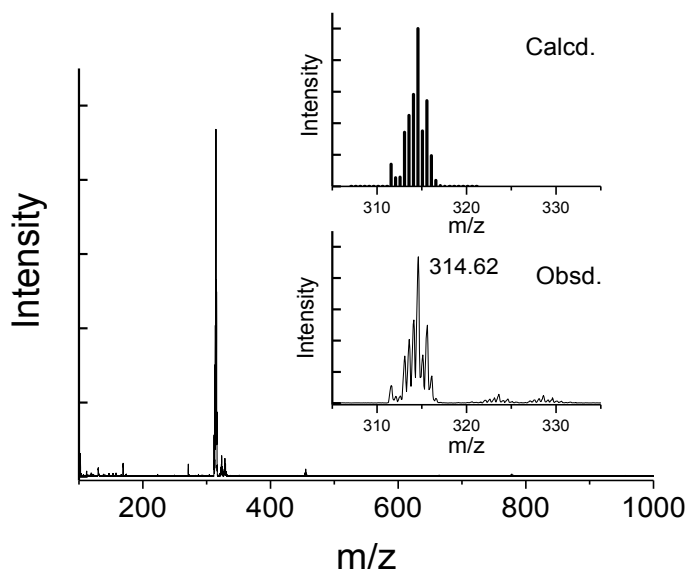

**Figure S21.** ESI MS spectrum of *proximal*-[Ru(C<sub>2</sub>tpy)(C<sub>2</sub>pyqu)Cl]Cl in CH<sub>3</sub>OH. Inset shows isotopic distribution patterns of the observed and calculated peaks at 314.62 (*proximal*-[Ru(C<sub>2</sub>tpy)(C<sub>2</sub>pq)]<sup>2+</sup>) m/z.

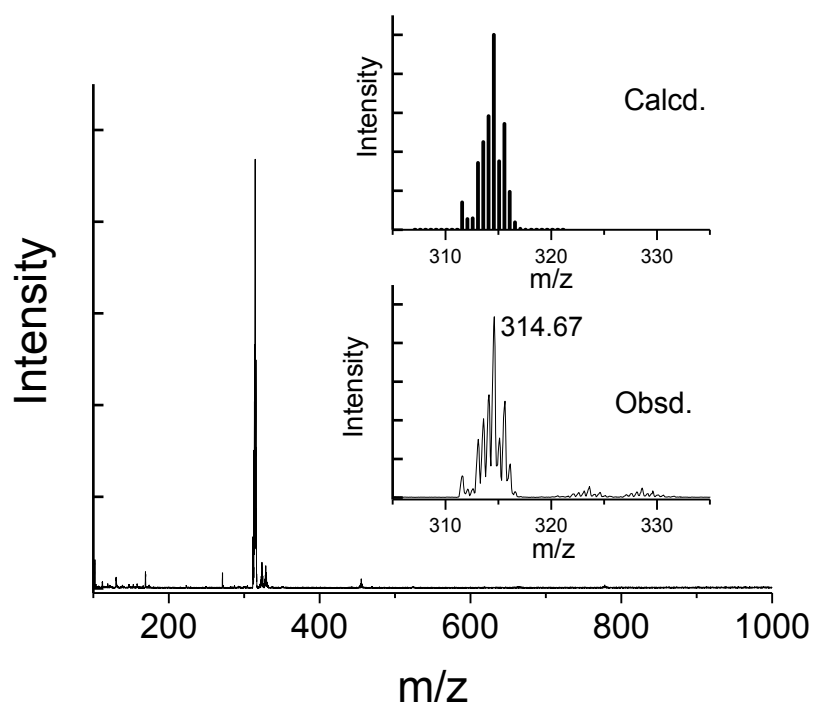

**Figure S22.** ESI MS spectrum of *proximal*-[1](OTf)<sub>2</sub> in CH<sub>3</sub>OH. Inset shows isotopic distribution patterns of the observed and calculated peaks at 314.67 (*proximal*-[Ru(C<sub>2</sub>tpy)(C<sub>2</sub>pq)]<sup>2+</sup>) m/z.

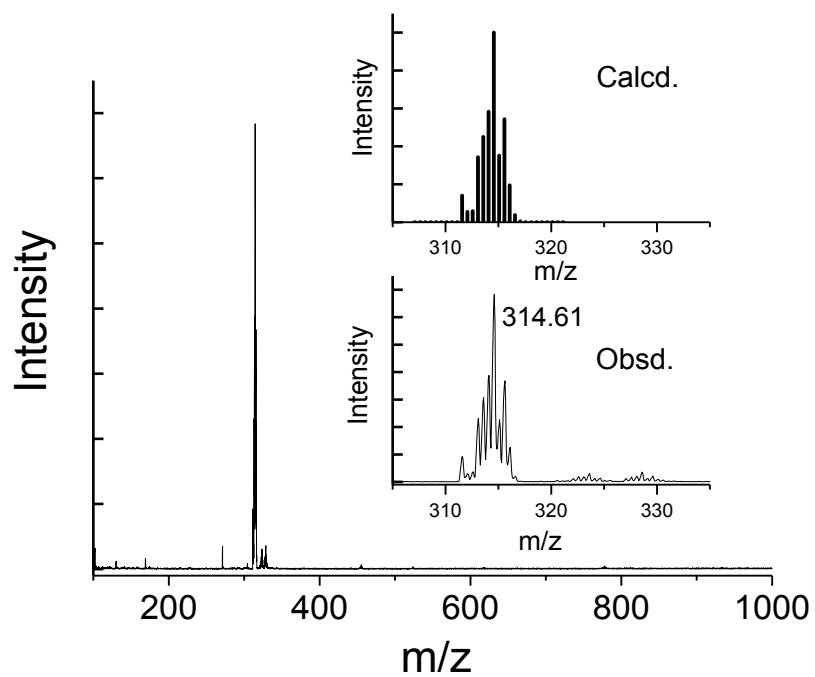

**Figure S23.** ESI MS spectrum of *distal*-[1](OTf)<sub>2</sub> in CH<sub>3</sub>OH. Inset shows isotopic distribution patterns of the observed and calculated peaks at 314.61 (*distal*-[Ru(C<sub>2</sub>tpy)(C<sub>2</sub>pq)]<sup>2+</sup>) m/z.

### Absorption spectra

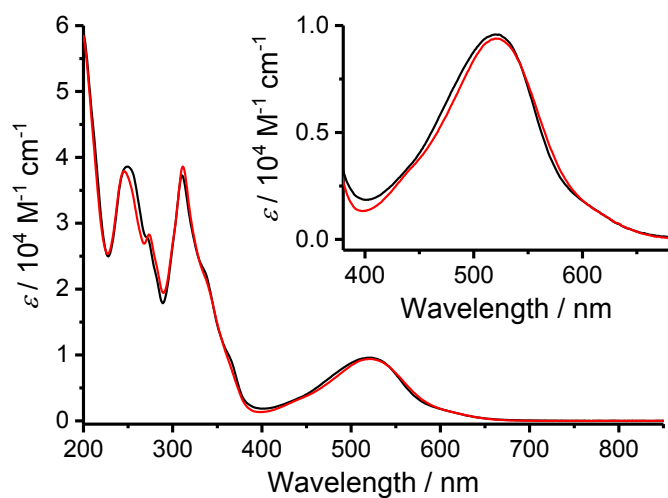

**Figure S24.** Absorption spectra of *proximal-1* (black) and *distal-1* (red) in water containing 0.2 % of methanol.

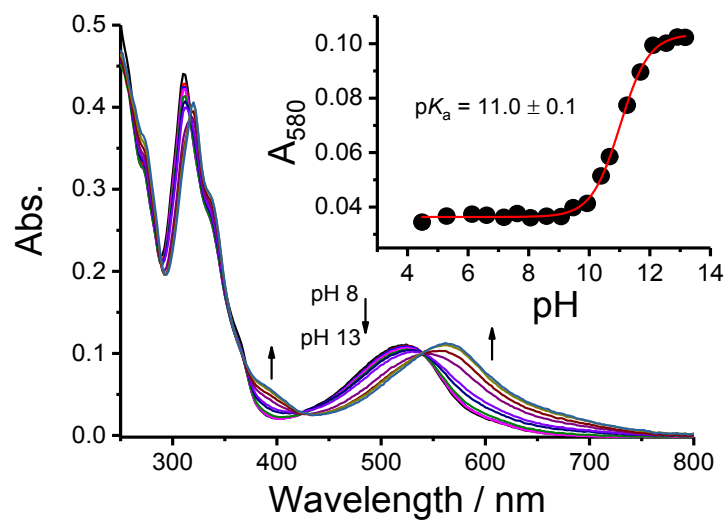

**Figure S25.** Absorption spectra of *proximal-1* during pH titration experiment in an aqueous buffer containing in boric acid (0.1 M),  $\text{KH}_2\text{PO}_4$  (0.05 M), and citric acid (0.02 M).

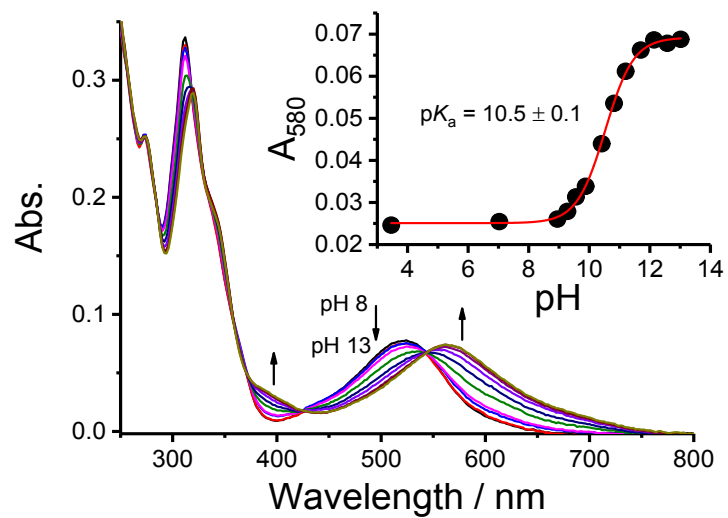

**Figure S26.** Absorption spectra of *distal-1* during pH titration experiment in an aqueous buffer containing in boric acid (0.1 M),  $\text{KH}_2\text{PO}_4$  (0.05 M), and citric acid (0.02 M).

*Additional figures for photo- and thermal-isomerization*

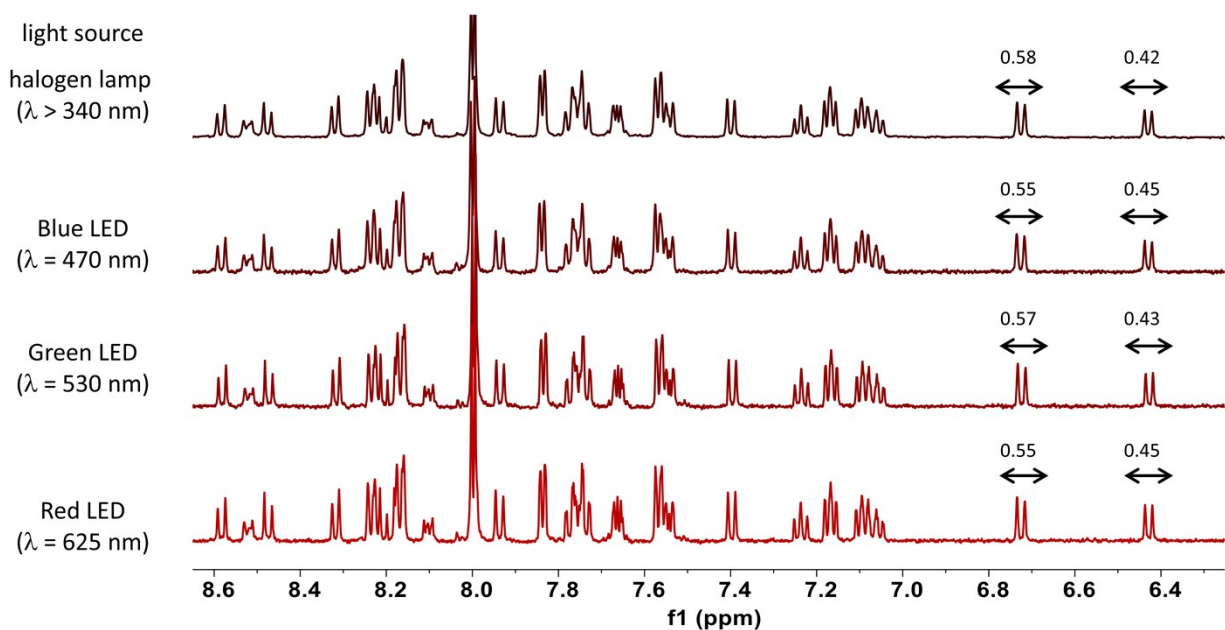

**Figure S27.** <sup>1</sup>H NMR spectra of *proximal-1* (2mM) in 20% CD<sub>3</sub>OD and 80% D<sub>2</sub>O after light irradiation with different light source. The samples were irradiated with light sources until they reached photostationary state. Peaks at 6.72 and 6.42 ppm correspond to *distal-1* and *proximal-1*, respectively.

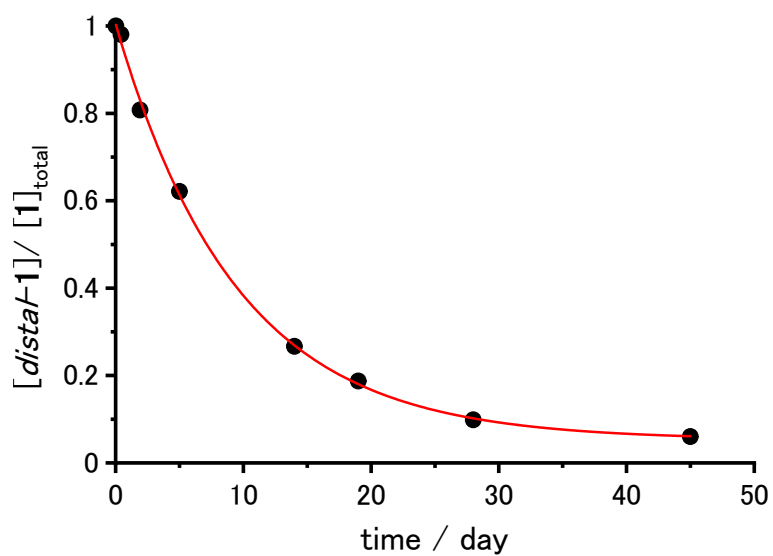

**Figure S28.** Kinetic traces for thermal-back-isomerization of *distal-1* to *proximal-1* at room temperature in CD<sub>3</sub>OD (20%) and D<sub>2</sub>O (80 %). The proportion of *distal-1* to the total concentration were estimated from the integration of peaks at 6.72 ppm (*distal-1*) and 6.42 ppm (*proximal-1*).



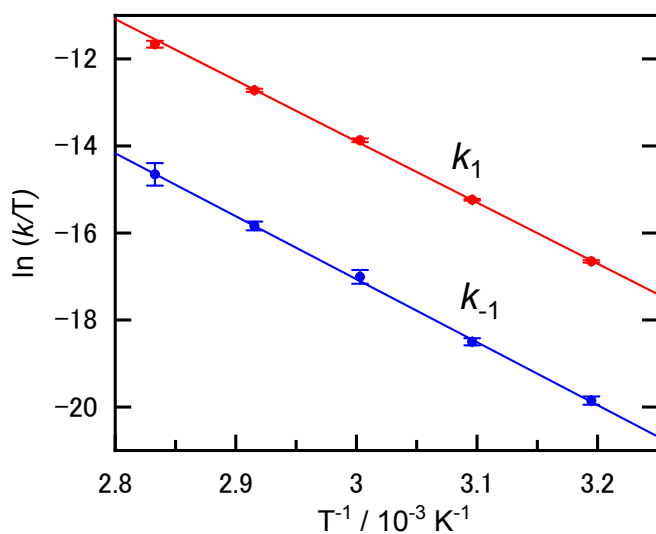

**Figure S29.** Eyring plots for the thermal isomerization between *proximal-1* and *distal-1*. Distal to proximal ( $k_1$ , red) and proximal to red ( $k_{-1}$ , blue).

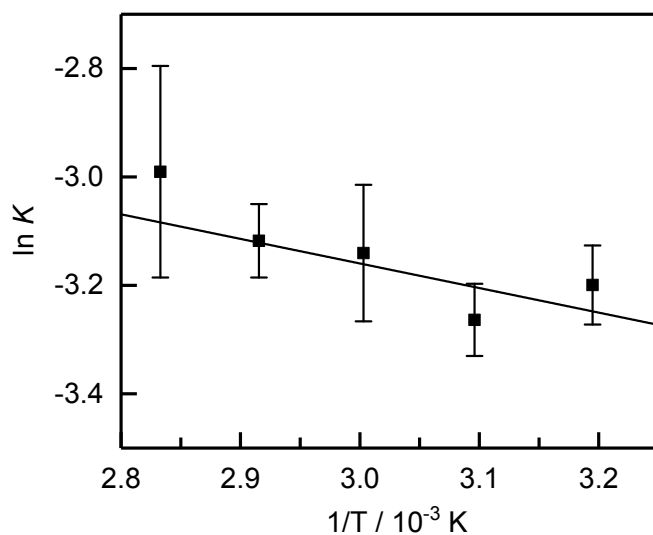

**Figure S30.** van't Hoff plots for the thermal isomerization between *proximal-1* and *distal-1*, where the equilibrium constant  $K$  was defined as  $K = k_{-1} / k_1$ .

**Table S1.** Summary of photoisomerization and thermal isomerization parameters

| Reaction                               | Photoisomerization   |                                   | Thermal isomerization                    |                                                       |                                          |
|----------------------------------------|----------------------|-----------------------------------|------------------------------------------|-------------------------------------------------------|------------------------------------------|
|                                        | $\Phi^a$             | $\Delta G / \text{kJ mol}^{-1} b$ | $\Delta H^\ddagger / \text{kJ mol}^{-1}$ | $\Delta S^\ddagger / \text{J K}^{-1} \text{mol}^{-1}$ | $\Delta G^\ddagger / \text{kJ mol}^{-1}$ |
| <i>proximal-1</i> →<br><i>distal-1</i> | $2.7 \times 10^{-3}$ | $8 \pm 3$                         | $117 \pm 2$                              | $37 \pm 1$                                            | $106 \pm 2$                              |
| <i>distal-1</i> →<br><i>proximal-1</i> | $1.9 \times 10^{-3}$ | $-8 \pm 3$                        | $120 \pm 2$                              | $22 \pm 1$                                            | $113 \pm 2$                              |

<sup>[a]</sup>Excitation wavelength:  $509 \pm 1.5 \text{ nm}$  ( $1.6 \text{ mW cm}^{-2}$ ). Solvent:  $\text{D}_2\text{O}$  80% and  $\text{CD}_3\text{OD}$  20%. <sup>[b]</sup>at 298 K

*Additional Figures for catalytic oxygen evolution*

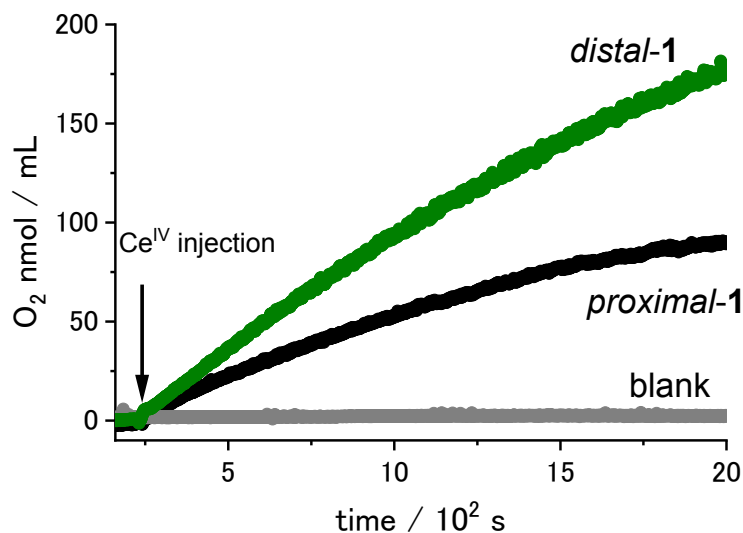

**Figure S31.** Catalytic oxygen evolution from *distal-1* (green), *proximal-1* (black), and blank (gray) at room temperature. Conditions: 68  $\mu\text{M}$  catalyst, 0.05 M ceric ammonium nitrate in 0.1 M triflic acid. Evolved oxygen was analyzed by Clark oxygen electrode.

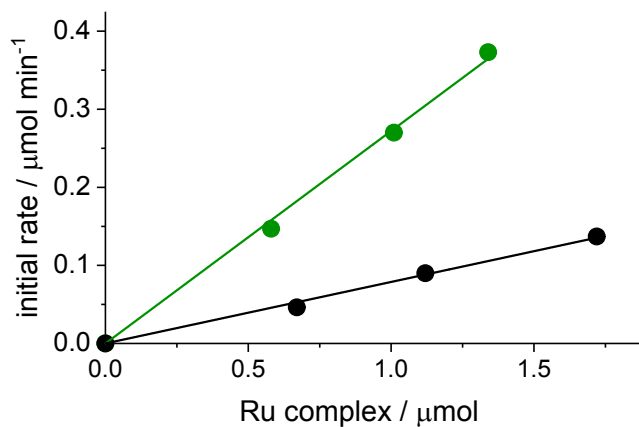

**Figure S32.** Plots of initial rate ( $v_{\text{O}_2} / \text{mol s}^{-1}$ ) of  $\text{O}_2$  evolved vs the amount of Ru complex for *proximal-1* (black) and *distal-1* (green). Conditions: ruthenium complexes, 39-104  $\mu\text{M}$  catalyst, 0.05 M ceric ammonium nitrate in 0.1 M triflic acid. Evolved oxygen was analyzed by gas chromatography.

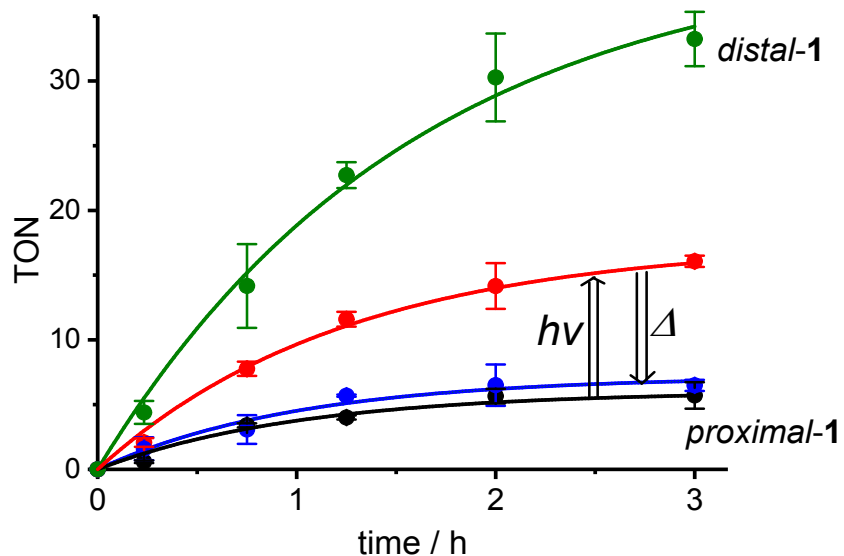

**Figure S33.** Catalytic oxygen evolution from  $\text{Ce}^{\text{IV}}(\text{NH}_4)_2(\text{NO}_3)_6$  (0.05 M) in the presence of a ruthenium catalyst (67  $\mu\text{M}$ ) in 0.1 M triflic acid (15 mL) and trifluoroethanol (20  $\mu\text{L}$ ). *Proximal-1* (black), *proximal-1* after light irradiation at room temperature (red), *proximal-1* after the light irradiation followed by heating at 333 K overnight in the dark (blue), and *distal-1* (green). The external stimuli was applied prior to the mixing with  $\text{Ce}^{\text{IV}}(\text{NH}_4)_2(\text{NO}_3)_6$ .

### Electrochemical measurements

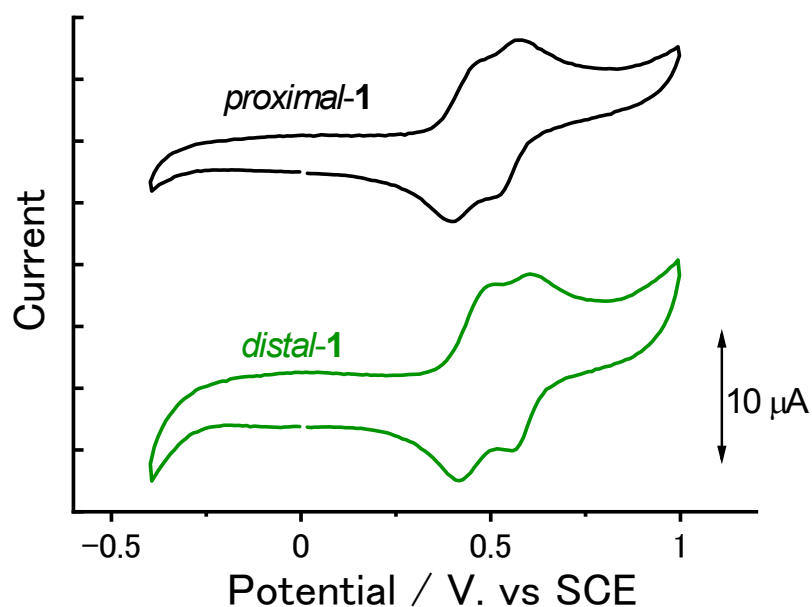

**Figure S34.** Cyclic voltammograms of 1 mM *proximal-1* (top, black) and *distal-1* (bottom, green) in a mixed buffer solution (5 mM  $\text{Na}_2\text{B}_4\text{O}_7$ , 10 mM  $\text{KH}_2\text{PO}_4$ , 5 mM citric acid, pH 7) using glassy carbon electrode ( $0.071 \text{ cm}^2$ ) at room temperature. (scan rate =  $100 \text{ mV s}^{-1}$ ).

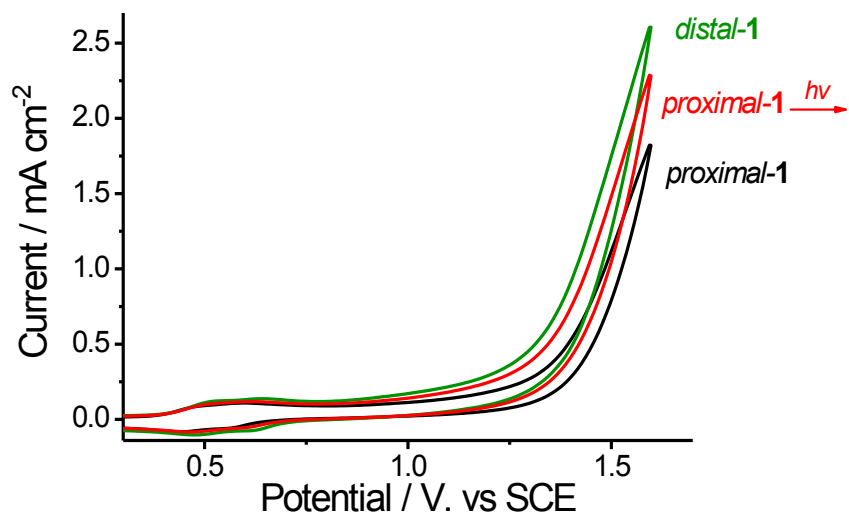

**Figure 35.** Cyclic voltammograms of 1 mM *proximal-1* (black), *proximal-1* after light irradiation with Xenon lamp ( $\lambda > 340 \text{ nm}$ ,  $70 \text{ mW cm}^{-2}$ ) for 2h (red), and *distal-1* (green) in a mixed buffer solution (5 mM  $\text{Na}_2\text{B}_4\text{O}_7$ , 10 mM  $\text{KH}_2\text{PO}_4$ , 5 mM citric acid, pH 7) using glassy carbon electrode ( $0.071 \text{ cm}^2$ ) at room temperature. (scan rate =  $100 \text{ mV s}^{-1}$ ).

## Crystallographic information

### Refinement details

**Table S1.** Selected crystallographic parameters

| compounds                                                                 | <i>proximal</i> -[ <b>1</b> ](OTf) <sub>2</sub> ·2H <sub>2</sub> O                                                         | <i>distal</i> -[ <b>1</b> ](OTf) <sub>2</sub> ·2H <sub>2</sub> O                                                           |
|---------------------------------------------------------------------------|----------------------------------------------------------------------------------------------------------------------------|----------------------------------------------------------------------------------------------------------------------------|
| empirical formula                                                         | RuO <sub>3</sub> N <sub>5</sub> C <sub>33</sub> H <sub>31</sub> , 2(CF <sub>3</sub> O <sub>3</sub> S), 2(H <sub>2</sub> O) | RuO <sub>3</sub> N <sub>5</sub> C <sub>33</sub> H <sub>31</sub> , 2(CF <sub>3</sub> O <sub>3</sub> S), 2(H <sub>2</sub> O) |
| fw                                                                        | 980.9                                                                                                                      | 980.9                                                                                                                      |
| radiation                                                                 | Mo K $\alpha$                                                                                                              | Mo K $\alpha$                                                                                                              |
| crystal system                                                            | triclinic                                                                                                                  | triclinic                                                                                                                  |
| space group                                                               | <i>P</i> 1                                                                                                                 | <i>P</i> $\bar{1}$                                                                                                         |
| <i>a</i> , Å                                                              | 10.011(4)                                                                                                                  | 11.5955(2)                                                                                                                 |
| <i>b</i> , Å                                                              | 13.646(5)                                                                                                                  | 13.3944(2)                                                                                                                 |
| <i>c</i> , Å                                                              | 16.369(6)                                                                                                                  | 13.4286(2)                                                                                                                 |
| $\alpha$ , deg                                                            | 66.564(5)                                                                                                                  | 94.6542(9)                                                                                                                 |
| $\beta$ , deg                                                             | 72.663(5)                                                                                                                  | 108.3216(8)                                                                                                                |
| $\gamma$ , deg                                                            | 78.969(5)                                                                                                                  | 99.0418(9)                                                                                                                 |
| <i>V</i> , Å <sup>3</sup>                                                 | 1951.7(12)                                                                                                                 | 1936.28(5)                                                                                                                 |
| <i>Z</i>                                                                  | 2                                                                                                                          | 2                                                                                                                          |
| $\mu$ , mm <sup>-1</sup>                                                  | 0.604                                                                                                                      | 0.609                                                                                                                      |
| <i>T</i> , K                                                              | 100                                                                                                                        | 100                                                                                                                        |
| <i>d</i> <sub>cal</sub> , g/cm <sup>3</sup>                               | 1.669                                                                                                                      | 1.682                                                                                                                      |
| <i>T</i> <sub>min</sub> , <i>T</i> <sub>max</sub>                         | 0.6786, 0.7456                                                                                                             | 0.704, 0.746                                                                                                               |
| <i>N</i> <sub>ref</sub>                                                   | 17689                                                                                                                      | 9001                                                                                                                       |
| <i>R</i> [ <i>F</i> <sup>2</sup> > 2 $\sigma$ ( <i>F</i> <sup>2</sup> )]  | 0.0647                                                                                                                     | 0.0391                                                                                                                     |
| <i>wR</i> [ <i>F</i> <sup>2</sup> > 2 $\sigma$ ( <i>F</i> <sup>2</sup> )] | 0.1027                                                                                                                     | 0.0840                                                                                                                     |
| GOF                                                                       | 1.0033                                                                                                                     | 1.051                                                                                                                      |

**Table 2.** Selected bond distances (Å) and angles (°) for *proximal/distal-1*, *proximal/distal-2* ([Ru(tpy)(pq)OH<sub>2</sub>]<sup>2+</sup>), and *proximal-Cl* ([Ru(tpy)(6'-chloro-pyridiylquinoline)OH<sub>2</sub>]<sup>2+</sup>).

|                   | <i>proximal-1</i> | <i>distal-1</i> | <i>proximal-2</i> <sup>8</sup> | <i>distal-2</i> <sup>8</sup> | <i>proximal-Cl</i> <sup>9</sup> |
|-------------------|-------------------|-----------------|--------------------------------|------------------------------|---------------------------------|
| Ru1-O1            | 2.148(3)          | 2.134(2)        | 2.137(8)                       | 2.132(5)                     | 2.129(4)                        |
| Ru1-N1            | 2.079(4)          | 2.108(8)        | 2.061(8)                       | 2.064(5)                     | 2.091(4)                        |
| Ru1-N2            | 1.951(4)          | 1.966(6)        | 1.937(7)                       | 1.970(5)                     | 1.961(3)                        |
| Ru1-N3            | 2.057(5)          | 2.043(6)        | 2.060(8)                       | 2.069(5)                     | 2.070(4)                        |
| Ru1-N4            | 2.064(4)          | 2.058(3)        | 2.091(9)                       | 2.067(5)                     | 2.057(4)                        |
| Ru1-N5            | 2.110(4)          | 2.102(3)        | 2.139(9)                       | 2.103(5)                     | 2.096(3)                        |
| O1-Ru1-N1         | 87.21(14)         | 85.9(3)         | 86.9(3)                        | 87.6(2)                      | 87.51(15)                       |
| O1-Ru1-N2         | 81.09(15)         | 79.9(2)         | 84.0(3)                        | 84.4(2)                      | 84.44(14)                       |
| O1-Ru1-N3         | 87.63(15)         | 88.12(18)       | 91.0(3)                        | 88.7(2)                      | 89.52(15)                       |
| O1-Ru1-N4         | 177.14(17)        | 98.85(10)       | 175.5(3)                       | 91.6(2)                      | 170.76(14)                      |
| O1-Ru1-N5         | 100.64(14)        | 172.82(12)      | 105.1(3)                       | 170.6(2)                     | 95.33(14)                       |
| N1-Ru1-N2         | 79.71(18)         | 78.1(3)         | 79.7(3)                        | 79.3(2)                      | 79.53(15)                       |
| N1-Ru1-N3         | 159.35(17)        | 158.5(2)        | 159.5(3)                       | 159.5(2)                     | 158.81(13)                      |
| N1-Ru1-N4         | 90.30(16)         | 97.9(2)         | 88.6(3)                        | 101.7(2)                     | 87.09(16)                       |
| N1-Ru1-N5         | 94.23(17)         | 87.4(3)         | 101.3(3)                       | 94.0(2)                      | 98.12(15)                       |
| N2-Ru1-N3         | 79.74(18)         | 80.5(2)         | 79.9(3)                        | 80.2(2)                      | 79.31(15)                       |
| N2-Ru1-N4         | 99.86(17)         | 175.83(18)      | 94.4(3)                        | 175.8(2)                     | 101.93(15)                      |
| N2-Ru1-N5         | 173.65(17)        | 101.4(2)        | 170.8(3)                       | 105.0(2)                     | 177.64(17)                      |
| N3-Ru1-N4         | 95.19(17)         | 103.47(16)      | 92.9(3)                        | 98.6(2)                      | 98.20(16)                       |
| N3-Ru1-N5         | 106.37(17)        | 99.05(19)       | 98.9(3)                        | 92.9(2)                      | 103.04(14)                      |
| N4-Ru1-N5         | 78.13(17)         | 79.28(10)       | 76.6(4)                        | 79.0(2)                      | 78.03(14)                       |
| O1-Ru1-N4-<br>O3  |                   | 14.91 (12)      |                                |                              |                                 |
| O1-Ru1-N5-<br>C31 | 24.6 (2)          |                 | 4.5978(12)                     |                              |                                 |

*DFT calculations*

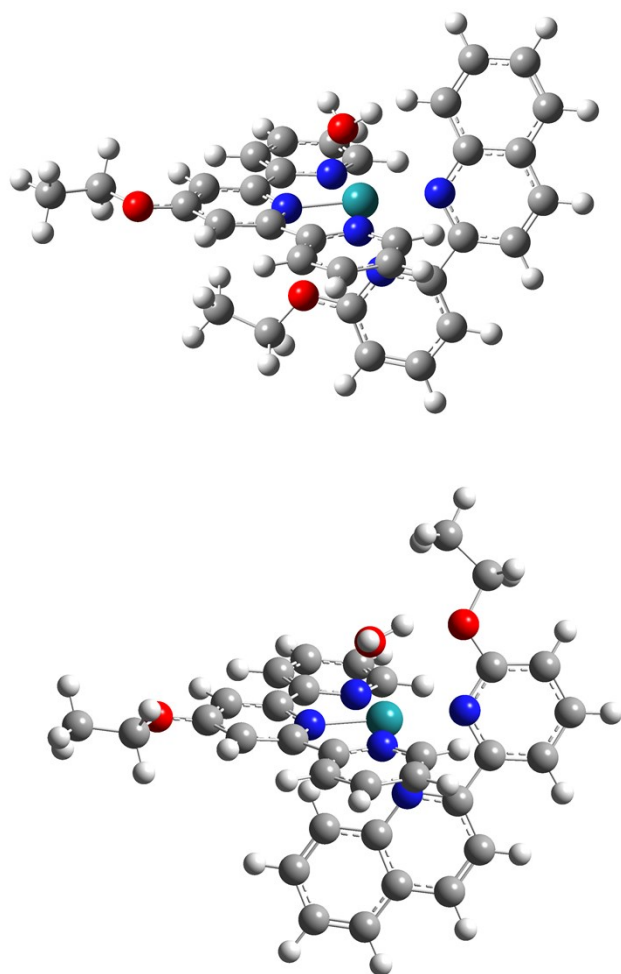

**Figure S36.** Optimized structures of *proximal-1*(top) and *distal-1* (bottom). The sum of electronic and thermal free energy for *proximal* and *distal-1* were -1868.821662 and -1868.827547 a.u., respectively. The thermal free energy of *distal-1* was lower than that of *proximal-1* by 15.45 kJ mol<sup>-1</sup>.



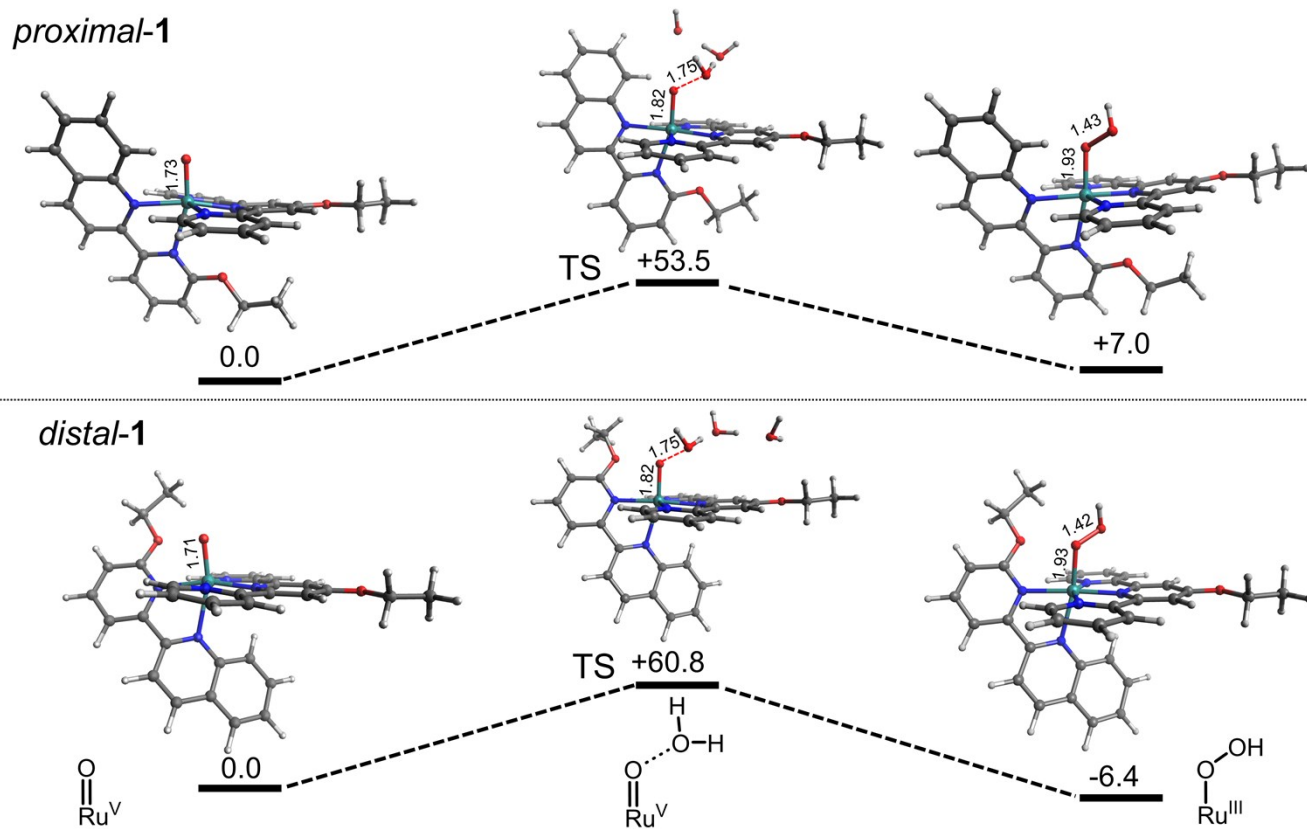

**Figure S37.** Energy diagram by DFT calculations for nucleophilic attack of the water molecule to the  $\text{Ru}^{\text{V}}=\text{O}$  to form peroxide species. The values are in kJ/mol with respect to  $\text{Ru}^{\text{V}}=\text{O}$ . Transition states (TS) were modeled with the  $\text{Ru}^{\text{V}}=\text{O}$  complex with three water molecules.

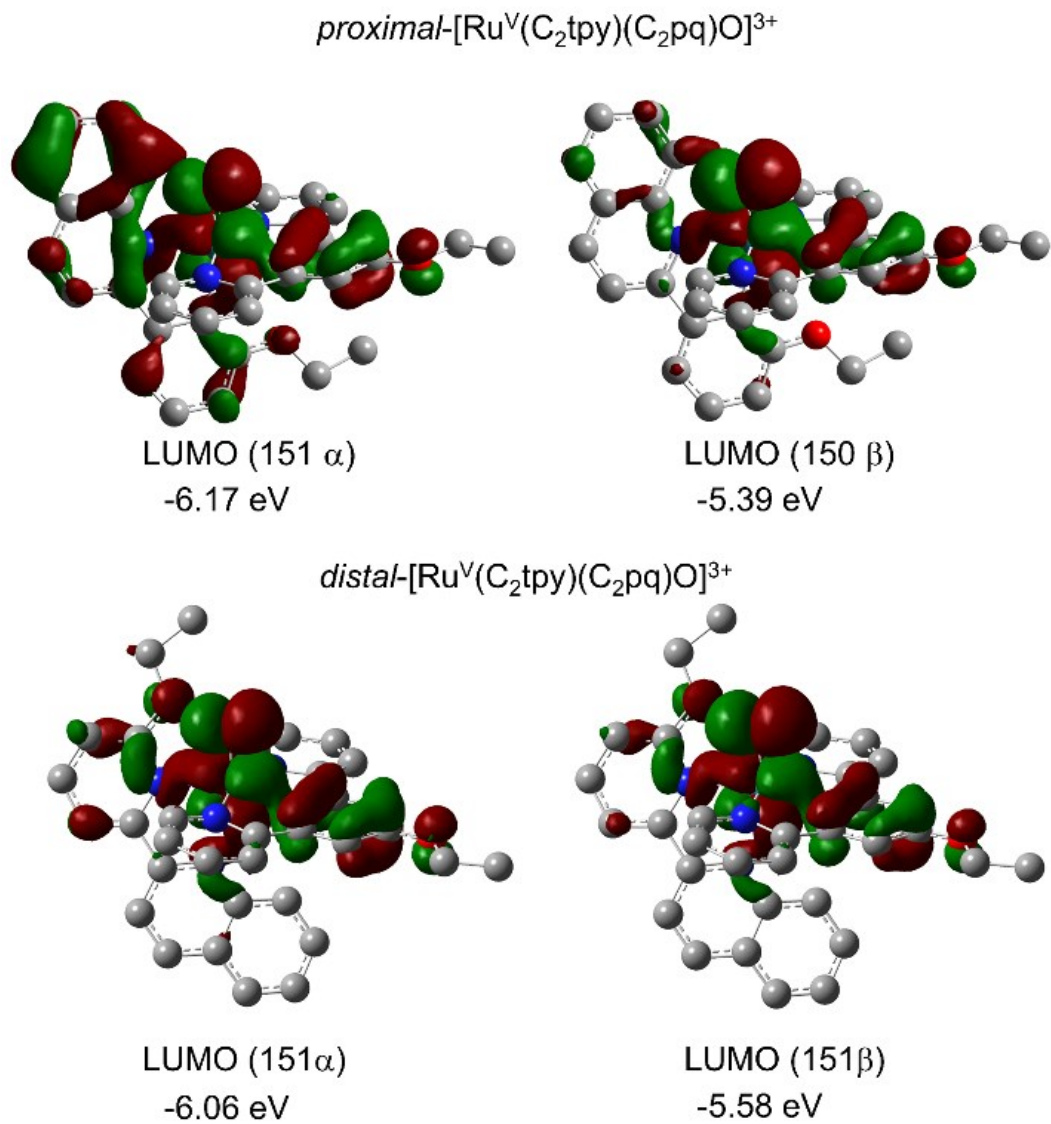

**Figure S38.** Lowest unoccupied molecular orbitals (LUMOs) of *proximal*- and *distal*-[Ru(C<sub>2</sub>tpy)(C<sub>2</sub>pq)O]<sup>3+</sup>. Hydrogen atoms have been removed for clarity.

## Cartesian Coordinates and Energies

*proximal-1* (Singlet)

Energy: -1868.821662 a.u.

|    |          |          |          |   |          |          |          |
|----|----------|----------|----------|---|----------|----------|----------|
| Ru | -0.51525 | 0.14919  | -0.20362 | C | 2.11816  | 3.19441  | 1.26926  |
| O  | 5.4171   | -0.05091 | -1.54952 | H | 3.18858  | 3.3356   | 1.18018  |
| O  | -0.31456 | 1.11299  | -2.20852 | C | -1.34098 | -2.51368 | -1.68114 |
| H  | -0.02005 | 2.04054  | -2.21762 | H | -2.3484  | -2.22383 | -1.40727 |
| H  | -1.12641 | 1.08992  | -2.74431 | C | 7.69877  | 0.61437  | -1.75929 |
| O  | 1.33761  | -0.89872 | 2.24921  | H | 8.04109  | -0.33349 | -1.33265 |
| N  | 1.46971  | 0.02211  | -0.47859 | H | 7.65353  | 0.51511  | -2.8482  |
| N  | -2.6602  | 0.21531  | 0.01777  | H | 8.43014  | 1.39025  | -1.51191 |
| N  | -0.36076 | -1.67578 | -1.3076  | C | 3.59337  | 1.1002   | -0.42277 |
| N  | 0.14932  | 1.90119  | 0.78027  | H | 4.20638  | 1.93712  | -0.12005 |
| N  | -0.826   | -0.96117 | 1.55515  | C | -0.02261 | 3.9024   | 2.09607  |
| C  | 1.503    | 2.09205  | 0.676    | H | -0.65884 | 4.58577  | 2.64698  |
| C  | 1.9577   | -0.99473 | -1.22357 | C | 3.30043  | -1.02096 | -1.57236 |
| C  | -5.381   | -0.48792 | 0.0337   | H | 3.72662  | -1.81672 | -2.16999 |
| H  | -6.42352 | -0.79026 | 0.00831  | C | 0.106    | -1.38932 | 2.43883  |
| C  | -0.21233 | -2.28516 | 3.47469  | C | -3.56513 | 0.96557  | -0.70413 |
| H  | 0.55102  | -2.62898 | 4.15751  | C | -3.14183 | 2.12952  | -1.39405 |
| C  | 0.93253  | -1.98197 | -1.63809 | H | -2.1167  | 2.45761  | -1.28914 |
| C  | -1.51831 | -2.72519 | 3.60899  | C | -3.11876 | -0.75514 | 0.82483  |
| H  | -1.78017 | -3.41861 | 4.40115  | C | 3.64846  | -0.53927 | 2.82874  |
| C  | 0.21315  | -4.01622 | -2.71468 | H | 3.99734  | -0.83033 | 1.83457  |
| H  | 0.44195  | -4.92684 | -3.25823 | H | 3.50574  | 0.54494  | 2.85462  |
| C  | -1.09993 | -3.69224 | -2.38385 | H | 4.42431  | -0.80116 | 3.55554  |
| H  | -1.93043 | -4.3322  | -2.65951 | C | 6.34455  | 1.00063  | -1.19672 |
| C  | -4.95155 | 0.61333  | -0.74555 | H | 5.99     | 1.94639  | -1.62291 |
| C  | 4.13509  | 0.03815  | -1.16579 | H | 6.37789  | 1.09594  | -0.10524 |
| C  | -4.03869 | 2.87044  | -2.13597 |   |          |          |          |
| H  | -3.69934 | 3.76734  | -2.64501 |   |          |          |          |
| C  | 2.37276  | -1.2665  | 3.19833  |   |          |          |          |
| H  | 2.04128  | -0.98599 | 4.20377  |   |          |          |          |
| H  | 2.51469  | -2.35189 | 3.16143  |   |          |          |          |
| C  | -5.84482 | 1.38209  | -1.535   |   |          |          |          |
| H  | -6.8908  | 1.09103  | -1.56768 |   |          |          |          |
| C  | -2.12246 | -1.37096 | 1.72159  |   |          |          |          |
| C  | -2.49157 | -2.25687 | 2.73171  |   |          |          |          |
| H  | -3.52038 | -2.56626 | 2.85042  |   |          |          |          |
| C  | -4.48365 | -1.14061 | 0.83922  |   |          |          |          |
| H  | -4.81474 | -1.95997 | 1.46252  |   |          |          |          |
| C  | 2.23898  | 1.05676  | -0.08932 |   |          |          |          |
| C  | -0.58199 | 2.78652  | 1.47785  |   |          |          |          |
| H  | -1.64501 | 2.58292  | 1.53327  |   |          |          |          |
| C  | 1.35006  | 4.11081  | 1.98645  |   |          |          |          |
| H  | 1.82145  | 4.96928  | 2.45304  |   |          |          |          |
| C  | -5.39704 | 2.4854   | -2.22731 |   |          |          |          |
| H  | -6.08587 | 3.0741   | -2.82484 |   |          |          |          |
| C  | 1.23765  | -3.14896 | -2.33848 |   |          |          |          |
| H  | 2.26616  | -3.38203 | -2.58686 |   |          |          |          |

*distal-1* (Singlet)

**Energy:** -1868.827547 a.u.

|    |          |          |          |
|----|----------|----------|----------|
| Ru | 0.57904  | -0.30622 | 0.15968  |
| N  | 0.01239  | 0.70593  | 1.95643  |
| N  | -1.4208  | -0.49405 | 0.12016  |
| N  | 0.31631  | -1.40172 | -1.62718 |
| C  | 0.80636  | 1.32235  | 2.84688  |
| H  | 1.87229  | 1.25464  | 2.66293  |
| C  | 0.30812  | 2.01246  | 3.94978  |
| H  | 0.99472  | 2.49359  | 4.63701  |
| C  | -1.07051 | 2.06599  | 4.13797  |
| H  | -1.49661 | 2.59843  | 4.98167  |
| C  | -1.90358 | 1.42099  | 3.22466  |
| H  | -2.9786  | 1.45307  | 3.35453  |
| C  | -1.34562 | 0.74245  | 2.14153  |
| C  | -2.14946 | -0.00094 | 1.1409   |
| C  | -3.52002 | -0.24925 | 1.22026  |
| H  | -4.10225 | 0.14481  | 2.04079  |
| C  | -4.11639 | -1.04348 | 0.22654  |
| C  | -3.31973 | -1.5858  | -0.80139 |
| H  | -3.79032 | -2.22101 | -1.54119 |
| C  | -1.96356 | -1.29722 | -0.82861 |
| C  | -0.98593 | -1.77569 | -1.83617 |
| C  | -1.34218 | -2.54107 | -2.94665 |
| H  | -2.37553 | -2.82641 | -3.1033  |
| C  | -0.36247 | -2.93154 | -3.85813 |
| H  | -0.63081 | -3.52647 | -4.72469 |
| C  | 0.95704  | -2.54187 | -3.64008 |
| H  | 1.75151  | -2.81882 | -4.32378 |
| C  | 1.25281  | -1.77887 | -2.51309 |
| H  | 2.26416  | -1.45286 | -2.30087 |
| C  | -6.31549 | -0.8473  | 1.19318  |
| H  | -6.2713  | 0.24789  | 1.19028  |
| H  | -5.98795 | -1.21185 | 2.17367  |
| C  | -7.70713 | -1.34559 | 0.85515  |
| H  | -8.0226  | -0.98157 | -0.12747 |
| H  | -7.7388  | -2.43947 | 0.85313  |
| H  | -8.41594 | -0.97953 | 1.60462  |
| O  | -5.41858 | -1.35636 | 0.17897  |
| O  | 3.04194  | -2.3652  | 0.77346  |
| N  | 2.72058  | -0.16882 | 0.29139  |
| O  | 0.39708  | -2.23722 | 1.19544  |
| N  | 0.96809  | 1.60236  | -0.7094  |
| C  | 3.19651  | 1.08685  | 0.05764  |
| C  | 2.20298  | 2.06532  | -0.42727 |
| C  | 0.37998  | 3.84104  | -1.52789 |
| C  | -1.17794 | 1.98111  | -1.80086 |
| H  | -1.40969 | 0.93388  | -1.71134 |
| C  | 3.5949   | -1.13863 | 0.62784  |
| C  | 1.6517   | 4.30794  | -1.12629 |
| H  | 1.90488  | 5.35658  | -1.24909 |
| C  | 2.56158  | 3.42345  | -0.61196 |
| H  | 3.54611  | 3.76786  | -0.32772 |
| C  | 0.06809  | 2.45645  | -1.32408 |

|   |          |          |          |
|---|----------|----------|----------|
| C | -2.07599 | 2.83351  | -2.40813 |
| H | -3.018   | 2.43811  | -2.77584 |
| C | 4.54934  | 1.39713  | 0.20663  |
| H | 4.92079  | 2.39308  | 0.01154  |
| C | 5.4335   | 0.39406  | 0.59247  |
| H | 6.48825  | 0.61342  | 0.719    |
| C | 4.96255  | -0.89491 | 0.80034  |
| H | 5.63707  | -1.68924 | 1.08754  |
| C | -0.57271 | 4.69842  | -2.13605 |
| H | -0.316   | 5.74565  | -2.26699 |
| C | -1.78453 | 4.20812  | -2.56581 |
| H | -2.50821 | 4.86557  | -3.03718 |
| C | 3.90284  | -3.51803 | 1.00388  |
| H | 4.64607  | -3.55395 | 0.20201  |
| H | 4.41141  | -3.38768 | 1.964    |
| H | 1.33735  | -2.52528 | 1.19337  |
| H | 0.16561  | -2.10577 | 2.13184  |
| C | 3.02671  | -4.75463 | 1.00108  |
| H | 2.29474  | -4.72863 | 1.81485  |
| H | 2.50054  | -4.86046 | 0.04746  |
| H | 3.65902  | -5.63625 | 1.14517  |

*proximal*-[Ru<sup>V</sup>(C<sub>2</sub>tpy)(C<sub>2</sub>pq)O]<sup>3+</sup> (doublet)

**Energy:** -1867.83890511 a.u.

|    |          |          |          |
|----|----------|----------|----------|
| Ru | -0.51707 | 0.17434  | -0.43935 |
| O  | 5.39547  | -0.07805 | -1.44379 |
| O  | -0.86359 | 0.83961  | -1.99686 |
| O  | 1.40656  | -0.58620 | 2.27061  |
| N  | 1.44353  | 0.03610  | -0.55954 |
| N  | -2.63231 | 0.14100  | 0.01580  |
| N  | -0.31917 | -1.78939 | -1.26034 |
| N  | 0.05492  | 1.98248  | 0.49938  |
| N  | -0.71810 | -0.89187 | 1.54630  |
| C  | 1.40208  | 2.20867  | 0.40786  |
| C  | 1.97920  | -1.08048 | -1.13648 |
| C  | -5.32983 | -0.52460 | 0.26898  |
| H  | -6.37516 | -0.80658 | 0.34398  |
| C  | 0.05973  | -2.27221 | 3.35818  |
| H  | 0.86172  | -2.57442 | 4.01604  |
| C  | 0.99046  | -2.12745 | -1.46460 |
| C  | -1.18260 | -2.86690 | 3.45046  |
| H  | -1.35580 | -3.65361 | 4.17647  |
| C  | 0.31447  | -4.28362 | -2.28875 |
| H  | 0.56657  | -5.26129 | -2.68446 |
| C  | -1.01379 | -3.91556 | -2.09712 |
| H  | -1.83091 | -4.58389 | -2.34096 |
| C  | -4.95922 | 0.56616  | -0.54627 |
| C  | 4.12413  | 0.02049  | -1.11878 |
| C  | -4.17555 | 2.76750  | -2.09238 |
| H  | -3.87631 | 3.64171  | -2.66103 |
| C  | 2.45303  | -0.80471 | 3.27064  |
| H  | 2.00206  | -0.69327 | 4.26067  |
| H  | 2.82991  | -1.82487 | 3.15459  |
| C  | -5.91647 | 1.31109  | -1.27857 |
| H  | -6.95768 | 1.00919  | -1.22535 |
| C  | -1.96202 | -1.43405 | 1.69405  |
| C  | -2.22393 | -2.42927 | 2.62698  |
| H  | -3.20913 | -2.86142 | 2.72796  |
| C  | -4.37521 | -1.19985 | 0.99185  |
| H  | -4.66570 | -2.00281 | 1.65407  |
| C  | 2.18175  | 1.13344  | -0.23738 |
| C  | -0.73538 | 2.86430  | 1.12771  |
| H  | -1.78793 | 2.61915  | 1.18838  |
| C  | 1.13515  | 4.29733  | 1.57120  |
| H  | 1.56172  | 5.20378  | 1.98624  |
| C  | -5.53145 | 2.39212  | -2.04860 |
| H  | -6.27060 | 2.96123  | -2.60191 |
| C  | 1.32833  | -3.37790 | -1.97202 |
| H  | 2.36709  | -3.64627 | -2.11865 |
| C  | 1.96093  | 3.36792  | 0.93420  |
| H  | 3.02678  | 3.54509  | 0.86267  |
| C  | -1.29304 | -2.65327 | -1.57737 |
| H  | -2.31152 | -2.32319 | -1.41705 |
| C  | 7.67561  | 0.58739  | -1.73139 |
| H  | 8.02718  | -0.29117 | -1.18272 |
| H  | 7.63557  | 0.35031  | -2.79848 |

|   |          |          |          |
|---|----------|----------|----------|
| H | 8.39388  | 1.39962  | -1.58299 |
| C | 3.53431  | 1.15989  | -0.51800 |
| H | 4.12526  | 2.03500  | -0.28961 |
| C | -0.22787 | 4.04024  | 1.67752  |
| H | -0.90015 | 4.72823  | 2.17592  |
| C | 3.32612  | -1.11406 | -1.41701 |
| H | 3.79602  | -1.96473 | -1.89321 |
| C | 0.26347  | -1.25637 | 2.39800  |
| C | -3.57065 | 0.91204  | -0.63768 |
| C | -3.21011 | 2.05642  | -1.39634 |
| H | -2.19508 | 2.42355  | -1.39202 |
| C | -3.02062 | -0.83268 | 0.86390  |
| C | 3.54728  | 0.21850  | 3.06035  |
| H | 4.03155  | 0.09473  | 2.08894  |
| H | 3.15789  | 1.23709  | 3.14607  |
| H | 4.30524  | 0.07605  | 3.83726  |
| C | 6.31999  | 1.03323  | -1.22609 |
| H | 5.94329  | 1.90035  | -1.77694 |
| H | 6.33620  | 1.25793  | -0.15561 |

*distal*-[Ru<sup>V</sup>(C<sub>2</sub>tpy)(C<sub>2</sub>pq)O]<sup>3+</sup> (doublet)

**Energy:** -1867.83607091 a.u.

|    |          |          |          |
|----|----------|----------|----------|
| Ru | -0.70714 | -0.38718 | -0.40200 |
| N  | -0.10605 | 1.13158  | -1.77907 |
| N  | 1.23449  | -0.65853 | -0.39356 |
| N  | -0.55048 | -1.92856 | 1.04122  |
| C  | -0.88460 | 1.98521  | -2.45648 |
| H  | -1.95311 | 1.90052  | -2.30370 |
| C  | -0.34814 | 2.93613  | -3.32362 |
| H  | -1.01252 | 3.60920  | -3.85217 |
| C  | 1.03221  | 2.99464  | -3.48417 |
| H  | 1.48261  | 3.72723  | -4.14458 |
| C  | 1.84198  | 2.09268  | -2.79049 |
| H  | 2.91731  | 2.12317  | -2.91298 |
| C  | 1.25192  | 1.15849  | -1.94538 |
| C  | 2.00481  | 0.12484  | -1.20538 |
| C  | 3.35669  | -0.13166 | -1.31872 |
| H  | 3.97541  | 0.46936  | -1.96878 |
| C  | 3.90846  | -1.21692 | -0.59378 |
| C  | 3.07144  | -2.02121 | 0.22533  |
| H  | 3.51427  | -2.85359 | 0.75651  |
| C  | 1.73405  | -1.72118 | 0.31504  |
| C  | 0.72355  | -2.42385 | 1.13067  |
| C  | 1.00956  | -3.49554 | 1.96908  |
| H  | 2.01814  | -3.88359 | 2.03834  |
| C  | -0.01876 | -4.06405 | 2.72414  |
| H  | 0.19235  | -4.90094 | 3.38056  |
| C  | -1.30513 | -3.54273 | 2.62880  |
| H  | -2.12839 | -3.95125 | 3.20250  |
| C  | -1.53640 | -2.46870 | 1.77084  |
| H  | -2.52072 | -2.03631 | 1.65688  |
| C  | 6.14540  | -0.83677 | -1.44134 |
| H  | 6.14575  | 0.20832  | -1.11875 |
| H  | 5.82031  | -0.90018 | -2.48396 |
| C  | 7.49002  | -1.49723 | -1.22594 |
| H  | 7.78863  | -1.44191 | -0.17518 |
| H  | 7.46436  | -2.54563 | -1.53664 |
| H  | 8.24016  | -0.97503 | -1.82787 |
| O  | 5.17431  | -1.56481 | -0.62275 |
| O  | -3.55731 | -1.69345 | -0.71305 |
| N  | -2.71933 | 0.28939  | -0.04393 |
| N  | -0.59377 | 1.35220  | 1.13268  |
| C  | -2.85798 | 1.56537  | 0.40939  |
| C  | -1.62723 | 2.18724  | 0.92897  |
| C  | 0.63668  | 3.20406  | 2.14736  |
| C  | 1.49565  | 0.91907  | 2.30653  |
| H  | 1.35614  | -0.14501 | 2.19595  |
| C  | -3.81136 | -0.43376 | -0.39308 |
| C  | -0.41985 | 4.07223  | 1.79609  |
| H  | -0.33419 | 5.13425  | 2.00376  |
| C  | -1.56653 | 3.56227  | 1.23541  |
| H  | -2.40026 | 4.21155  | 1.00470  |
| C  | 0.50377  | 1.80946  | 1.83410  |
| C  | 2.59793  | 1.39386  | 2.98702  |

|   |          |          |          |
|---|----------|----------|----------|
| H | 3.33701  | 0.69010  | 3.35638  |
| C | -4.10269 | 2.17916  | 0.45345  |
| H | -4.21171 | 3.18789  | 0.82677  |
| C | -5.22621 | 1.45800  | 0.03601  |
| H | -6.20725 | 1.91937  | 0.06422  |
| C | -5.09370 | 0.14579  | -0.37867 |
| H | -5.95756 | -0.44230 | -0.65664 |
| C | 1.79560  | 3.66425  | 2.82421  |
| H | 1.88649  | 4.72574  | 3.03327  |
| C | 2.76761  | 2.77727  | 3.22750  |
| H | 3.64868  | 3.12971  | 3.75344  |
| C | -4.61140 | -2.55262 | -1.24869 |
| H | -5.38165 | -2.66100 | -0.47944 |
| H | -5.03697 | -2.06156 | -2.12830 |
| C | -3.97126 | -3.88089 | -1.59196 |
| H | -3.19472 | -3.75606 | -2.35200 |
| H | -3.53197 | -4.34334 | -0.70315 |
| H | -4.74045 | -4.55170 | -1.98708 |
| O | -1.22104 | -1.43062 | -1.66032 |

*proximal*-[Ru<sup>III</sup>(C<sub>2</sub>tpy)(C<sub>2</sub>pq)OOH]<sup>2+</sup> (doublet)

**Energy:** -1943.85076279 a.u.

|    |          |          |          |
|----|----------|----------|----------|
| Ru | -0.51271 | 0.16015  | -0.21102 |
| O  | 5.42906  | 0.14082  | -1.43682 |
| O  | -0.59130 | 1.24460  | -1.80582 |
| O  | 1.33981  | -1.21843 | 2.15885  |
| N  | 1.47107  | 0.06943  | -0.46460 |
| N  | -2.68214 | 0.14056  | 0.05953  |
| N  | -0.33344 | -1.55202 | -1.52346 |
| N  | 0.11435  | 1.73437  | 1.02958  |
| N  | -0.80983 | -1.23042 | 1.43661  |
| C  | 1.46588  | 1.94976  | 0.97472  |
| C  | 1.97527  | -0.84880 | -1.31945 |
| C  | -5.39686 | -0.56455 | 0.07324  |
| H  | -6.44148 | -0.85989 | 0.04945  |
| C  | -0.16753 | -2.85856 | 3.09182  |
| H  | 0.59835  | -3.29695 | 3.71486  |
| C  | 0.96825  | -1.79348 | -1.86657 |
| C  | -1.45875 | -3.35191 | 3.11836  |
| H  | -1.70781 | -4.18746 | 3.76397  |
| C  | 0.29060  | -3.69329 | -3.18483 |
| H  | 0.54012  | -4.53016 | -3.82842 |
| C  | -1.03163 | -3.42949 | -2.83956 |
| H  | -1.84815 | -4.04315 | -3.20208 |
| C  | -4.99852 | 0.64328  | -0.54285 |
| C  | 4.14377  | 0.17640  | -1.07410 |
| C  | -4.15344 | 3.08107  | -1.62072 |
| H  | -3.83637 | 4.04164  | -2.01550 |
| C  | 2.37970  | -1.70611 | 3.05142  |
| H  | 2.01718  | -1.62687 | 4.08137  |
| H  | 2.57312  | -2.75888 | 2.82062  |
| C  | -5.93287 | 1.51871  | -1.15349 |
| H  | -6.97935 | 1.22871  | -1.17253 |
| C  | -2.09432 | -1.69328 | 1.50399  |
| C  | -2.44287 | -2.75873 | 2.32819  |
| H  | -3.45904 | -3.12195 | 2.37727  |
| C  | -4.47035 | -1.33449 | 0.72823  |
| H  | -4.78359 | -2.23719 | 1.23339  |
| C  | 2.22350  | 1.04004  | 0.08658  |
| C  | -0.64605 | 2.49985  | 1.82711  |
| H  | -1.70632 | 2.27725  | 1.83262  |
| C  | 1.25939  | 3.76056  | 2.55079  |
| H  | 1.71023  | 4.55065  | 3.14171  |
| C  | -5.51903 | 2.71690  | -1.68871 |
| H  | -6.23589 | 3.39008  | -2.14818 |
| C  | 1.30001  | -2.86508 | -2.69382 |
| H  | 2.33412  | -3.05732 | -2.95219 |
| C  | 2.05500  | 2.96279  | 1.72873  |
| H  | 3.12461  | 3.12705  | 1.68238  |
| C  | -1.29930 | -2.34669 | -2.00412 |
| H  | -2.31302 | -2.10258 | -1.71023 |
| C  | 7.71751  | 0.81777  | -1.50185 |
| H  | 8.04848  | -0.18243 | -1.20610 |
| H  | 7.69550  | 0.87425  | -2.59443 |
| H  | 8.44445  | 1.54735  | -1.13134 |
| C  | 3.58398  | 1.12562  | -0.20111 |
| H  | 4.18890  | 1.90875  | 0.23267  |

|   |          |          |          |
|---|----------|----------|----------|
| C | -0.11193 | 3.52505  | 2.60426  |
| H | -0.76657 | 4.11839  | 3.23205  |
| C | 3.32300  | -0.82384 | -1.63789 |
| H | 3.76995  | -1.53322 | -2.32245 |
| C | 0.12795  | -1.77796 | 2.23905  |
| C | -3.60761 | 0.98947  | -0.51635 |
| C | -3.21571 | 2.24267  | -1.05479 |
| H | -2.18028 | 2.54399  | -1.00791 |
| C | -3.10793 | -0.94576 | 0.72418  |
| C | 3.62345  | -0.86680 | 2.85068  |
| H | 4.00727  | -0.96241 | 1.83198  |
| H | 3.42620  | 0.18808  | 3.06280  |
| H | 4.39629  | -1.21710 | 3.54252  |
| C | 6.35335  | 1.12875  | -0.91827 |
| H | 6.00803  | 2.12559  | -1.21455 |
| H | 6.36147  | 1.06567  | 0.17562  |
| O | 0.35587  | 2.30869  | -1.90547 |
| H | 0.16979  | 2.62543  | -2.81089 |

*distal*-[Ru<sup>III</sup>(C<sub>2</sub>tpy)(C<sub>2</sub>pq)OOH]<sup>2+</sup> (doublet)

Energy: -1943.84663094 a.u.

|    |          |          |          |
|----|----------|----------|----------|
| Ru | -0.62600 | -0.29503 | -0.20636 |
| N  | -0.03211 | 0.94348  | -1.88068 |
| N  | 1.36420  | -0.54625 | -0.20075 |
| N  | -0.39406 | -1.57210 | 1.44954  |
| C  | -0.80323 | 1.67330  | -2.69758 |
| H  | -1.86947 | 1.64336  | -2.50654 |
| C  | -0.27924 | 2.43202  | -3.74300 |
| H  | -0.94523 | 3.00556  | -4.37722 |
| C  | 1.09798  | 2.43041  | -3.94116 |
| H  | 1.54504  | 3.01217  | -4.74019 |
| C  | 1.90548  | 1.66480  | -3.09955 |
| H  | 2.97869  | 1.65263  | -3.24400 |
| C  | 1.32178  | 0.92034  | -2.07597 |
| C  | 2.10147  | 0.05106  | -1.15629 |
| C  | 3.47066  | -0.19137 | -1.23900 |
| H  | 4.06769  | 0.28340  | -2.00380 |
| C  | 4.05441  | -1.07931 | -0.31628 |
| C  | 3.24742  | -1.70809 | 0.65381  |
| H  | 3.71105  | -2.40024 | 1.34511  |
| C  | 1.89200  | -1.42502 | 0.68524  |
| C  | 0.89987  | -1.98531 | 1.63186  |
| C  | 1.22759  | -2.86604 | 2.66109  |
| H  | 2.25348  | -3.18365 | 2.80215  |
| C  | 0.22554  | -3.33373 | 3.51054  |
| H  | 0.47105  | -4.02008 | 4.31387  |
| C  | -1.08530 | -2.90579 | 3.31497  |
| H  | -1.89409 | -3.24273 | 3.95304  |
| C  | -1.35379 | -2.02303 | 2.27163  |
| H  | -2.35584 | -1.66236 | 2.07669  |
| C  | 6.26581  | -0.80321 | -1.23932 |
| H  | 6.23056  | 0.28673  | -1.13305 |
| H  | 5.94383  | -1.07280 | -2.25142 |
| C  | 7.64792  | -1.34592 | -0.93379 |
| H  | 7.95564  | -1.07757 | 0.08145  |
| H  | 7.66904  | -2.43543 | -1.03336 |
| H  | 8.36815  | -0.91910 | -1.63884 |
| O  | 5.35147  | -1.39593 | -0.28402 |
| O  | -3.34084 | -2.04050 | -0.62931 |
| N  | -2.75834 | 0.09634  | -0.20548 |
| N  | -0.83293 | 1.61209  | 0.91235  |
| C  | -3.07787 | 1.39278  | 0.06222  |
| C  | -1.97707 | 2.23656  | 0.57985  |
| C  | 0.02960  | 3.73921  | 1.76751  |
| C  | 1.28577  | 1.66884  | 2.10238  |
| H  | 1.35849  | 0.59581  | 2.02987  |
| C  | -3.74259 | -0.77366 | -0.51831 |
| C  | -1.14491 | 4.37727  | 1.31005  |
| H  | -1.25224 | 5.45181  | 1.42347  |
| C  | -2.15190 | 3.63033  | 0.75347  |
| H  | -3.06385 | 4.11048  | 0.42624  |
| C  | 0.14863  | 2.32423  | 1.57059  |
| C  | 2.26931  | 2.38293  | 2.75327  |
| H  | 3.12476  | 1.85634  | 3.16505  |
| C  | -4.38197 | 1.86530  | -0.06556 |
| H  | -4.63176 | 2.89201  | 0.16149  |

|   |          |          |          |
|---|----------|----------|----------|
| C | -5.38228 | 0.97827  | -0.46562 |
| H | -6.40373 | 1.32534  | -0.58085 |
| C | -5.07485 | -0.35373 | -0.68474 |
| H | -5.84424 | -1.06029 | -0.96360 |
| C | 1.06845  | 4.45028  | 2.42202  |
| H | 0.96256  | 5.52378  | 2.54774  |
| C | 2.17447  | 3.78695  | 2.90199  |
| H | 2.96488  | 4.33142  | 3.40867  |
| C | -4.30197 | -3.07270 | -0.95878 |
| H | -5.09736 | -3.07110 | -0.20554 |
| H | -4.73928 | -2.84997 | -1.93810 |
| C | -3.55879 | -4.39387 | -0.96987 |
| H | -2.76117 | -4.38719 | -1.71836 |
| H | -3.12097 | -4.60177 | 0.01127  |
| H | -4.25840 | -5.19913 | -1.21524 |
| O | -0.74704 | -1.75337 | -1.46029 |
| O | 0.07752  | -2.88514 | -1.21434 |
| H | -0.09005 | -3.40620 | -2.02357 |



*proximal*-[Ru<sup>V</sup>(C<sub>2</sub>tpy)(C<sub>2</sub>pq)O]<sup>3+</sup> TS (3H<sub>2</sub>O)

(doublet)

**Energy:** -2097.12033371 a.u.

|    |          |          |          |
|----|----------|----------|----------|
| C  | 1.04589  | 1.38686  | 2.59889  |
| C  | -1.16379 | 1.43500  | 1.79715  |
| C  | -1.56353 | 2.20070  | 2.88823  |
| C  | -0.62244 | 2.56334  | 3.85310  |
| C  | 0.69953  | 2.14822  | 3.71143  |
| H  | 2.05864  | 1.03824  | 2.43885  |
| H  | -2.59712 | 2.50736  | 2.99112  |
| H  | -0.92595 | 3.15868  | 4.70741  |
| H  | 1.45746  | 2.40344  | 4.44246  |
| C  | -2.08491 | 0.96042  | 0.73968  |
| C  | -3.42610 | 1.27158  | 0.61854  |
| C  | -4.16826 | 0.70681  | -0.44402 |
| H  | -3.93135 | 1.93277  | 1.31087  |
| C  | -2.17777 | -0.41846 | -1.19065 |
| C  | -3.53353 | -0.15938 | -1.35637 |
| H  | -4.07977 | -0.59625 | -2.17946 |
| C  | -1.33600 | -1.24659 | -2.08384 |
| C  | -1.83390 | -1.97353 | -3.16198 |
| C  | 0.84632  | -1.95603 | -2.57134 |
| C  | -0.95552 | -2.70775 | -3.95957 |
| H  | -2.89459 | -1.97330 | -3.38017 |
| C  | 0.40512  | -2.69583 | -3.66567 |
| H  | 1.89578  | -1.91335 | -2.30790 |
| H  | -1.33542 | -3.27793 | -4.80032 |
| H  | 1.12224  | -3.24483 | -4.26437 |
| N  | 0.14324  | 1.04703  | 1.66481  |
| N  | -1.50417 | 0.13706  | -0.16546 |
| N  | 0.00289  | -1.25781 | -1.79764 |
| Ru | 0.48657  | -0.04290 | -0.10655 |
| C  | 5.66789  | 2.43026  | -1.02831 |
| C  | 5.97828  | 1.09200  | -0.94612 |
| C  | 4.98780  | 0.14505  | -0.58016 |
| C  | 3.64270  | 0.57745  | -0.33273 |
| C  | 4.35452  | 2.86361  | -0.73332 |
| H  | 6.29609  | -1.57938 | -0.62074 |
| H  | 6.42886  | 3.15482  | -1.30007 |
| H  | 6.98580  | 0.73740  | -1.14218 |
| C  | 5.28906  | -1.22556 | -0.42234 |
| H  | 4.10997  | 3.92053  | -0.75895 |
| C  | 3.00769  | -1.61786 | 0.23905  |
| C  | 4.32166  | -2.09295 | 0.01751  |
| H  | 4.56553  | -3.13269 | 0.18216  |
| C  | 3.36306  | 1.96560  | -0.39485 |
| N  | 2.66458  | -0.34125 | 0.00008  |
| C  | 1.95864  | -2.49598 | 0.79896  |
| C  | 2.21797  | -3.80618 | 1.18351  |
| C  | -0.23066 | -2.62294 | 1.63281  |
| C  | 1.20448  | -4.54169 | 1.79909  |
| H  | 3.18715  | -4.25640 | 1.02608  |
| C  | -0.02216 | -3.95316 | 2.04318  |
| H  | 1.38290  | -5.56821 | 2.10079  |

|   |          |          |          |
|---|----------|----------|----------|
| H | -0.80641 | -4.50668 | 2.53862  |
| N | 0.73130  | -1.92518 | 0.98912  |
| O | 0.74759  | 1.40335  | -1.17567 |
| O | -0.60420 | 2.09817  | -2.03323 |
| H | -0.67233 | 3.02957  | -1.43757 |
| H | -0.09860 | 2.30375  | -2.84569 |
| O | 1.70591  | 5.09197  | -0.42555 |
| H | 1.90531  | 5.62062  | -1.21653 |
| H | 1.80885  | 5.71040  | 0.31741  |
| O | -0.74706 | 4.07218  | -0.58465 |
| H | 0.15555  | 4.50846  | -0.51096 |
| H | -1.35801 | 4.75046  | -0.92110 |
| H | 2.37825  | 2.33867  | -0.15487 |
| O | -1.36642 | -1.95581 | 1.84738  |
| C | -2.41066 | -2.61124 | 2.62689  |
| C | -3.53668 | -1.62698 | 2.85719  |
| H | -1.97539 | -2.93462 | 3.57724  |
| H | -2.75692 | -3.48872 | 2.07202  |
| H | -3.18429 | -0.74157 | 3.39419  |
| H | -4.30301 | -2.11446 | 3.46847  |
| H | -3.99808 | -1.31962 | 1.91565  |
| O | -5.45068 | 1.05200  | -0.49680 |
| C | -6.30835 | 0.52260  | -1.54371 |
| C | -7.69075 | 1.10379  | -1.32646 |
| H | -6.31355 | -0.57014 | -1.47075 |
| H | -5.89618 | 0.81600  | -2.51506 |
| H | -8.36579 | 0.72386  | -2.09966 |
| H | -8.08591 | 0.81420  | -0.34817 |
| H | -7.66880 | 2.19577  | -1.39126 |

*distal*-[Ru<sup>V</sup>(C<sub>2</sub>tpy)(C<sub>2</sub>pq)O]<sup>3+</sup> TS (3H<sub>2</sub>O)

(doublet)

**Energy:** -2097.11456477 a.u.

|    |          |          |          |   |          |          |          |
|----|----------|----------|----------|---|----------|----------|----------|
| C  | -1.42463 | -1.66353 | 2.52857  | H | 2.19330  | 3.14371  | 3.02411  |
| C  | 0.85795  | -1.34242 | 2.07534  | C | -2.65358 | 1.99728  | 0.18137  |
| C  | 1.20499  | -1.99197 | 3.25613  | C | -3.14216 | 3.32325  | 0.13883  |
| C  | 0.19875  | -2.48935 | 4.08603  | H | -4.11013 | 3.53355  | -0.29449 |
| C  | -1.13435 | -2.32057 | 3.72158  | C | 0.52662  | 2.39694  | 1.92453  |
| H  | -2.44348 | -1.50668 | 2.19930  | N | -1.43204 | 1.69860  | 0.65946  |
| H  | 2.24581  | -2.10578 | 3.53251  | C | -3.48768 | 0.86609  | -0.27267 |
| H  | 0.46008  | -2.99681 | 5.00829  | C | -4.84547 | 0.99128  | -0.54454 |
| H  | -1.94422 | -2.68633 | 4.34160  | C | -3.57837 | -1.45708 | -0.58579 |
| C  | 1.84411  | -0.74629 | 1.14281  | C | -5.57333 | -0.15537 | -0.87218 |
| C  | 3.21876  | -0.78041 | 1.26998  | H | -5.34523 | 1.94738  | -0.48025 |
| C  | 4.01525  | -0.15148 | 0.28484  | C | -4.95192 | -1.39133 | -0.88197 |
| H  | 3.71275  | -1.28900 | 2.08781  | O | -2.87248 | -2.58052 | -0.49674 |
| C  | 2.01150  | 0.52585  | -0.86026 | H | -6.63326 | -0.08133 | -1.09066 |
| C  | 3.39890  | 0.51994  | -0.79047 | H | -5.51518 | -2.29027 | -1.09099 |
| H  | 3.98980  | 1.00302  | -1.55483 | N | -2.85869 | -0.34029 | -0.33947 |
| C  | 1.19562  | 1.13083  | -1.93743 | O | -0.54437 | -1.81824 | -1.08092 |
| C  | 1.73039  | 1.87689  | -2.98394 | O | 0.87607  | -2.00983 | -2.08427 |
| C  | -0.96359 | 1.37808  | -2.81987 | H | 1.45055  | -2.76734 | -1.53931 |
| C  | 0.88293  | 2.37964  | -3.97190 | H | 0.40743  | -2.45961 | -2.81571 |
| H  | 2.79523  | 2.06804  | -3.03192 | O | 4.75756  | -2.82807 | -1.32033 |
| C  | -0.48286 | 2.12196  | -3.89481 | H | 5.37457  | -3.12849 | -0.63211 |
| H  | -2.01746 | 1.14923  | -2.71946 | H | 5.09474  | -3.22246 | -2.14227 |
| H  | 1.29131  | 2.96205  | -4.79061 | O | 2.25242  | -3.61178 | -0.81274 |
| H  | -1.17423 | 2.48526  | -4.64590 | H | 3.21167  | -3.37856 | -0.99661 |
| N  | -0.45860 | -1.19207 | 1.72613  | H | 2.13275  | -4.53325 | -1.10069 |
| N  | 1.28400  | -0.09602 | 0.09040  | H | 0.83595  | 1.36990  | 2.03300  |
| N  | -0.15244 | 0.90204  | -1.86444 | C | -3.43257 | -3.87034 | -0.86727 |
| Ru | -0.69651 | -0.25988 | -0.16250 | C | -4.14760 | -4.52471 | 0.30340  |
| C  | 0.87338  | 4.75294  | 2.41888  | H | -4.47776 | -5.52550 | 0.00548  |
| C  | -0.31073 | 5.07395  | 1.79529  | H | -5.02705 | -3.95585 | 0.62017  |
| C  | -1.11707 | 4.06127  | 1.21537  | H | -3.47039 | -4.62465 | 1.15708  |
| C  | -0.67811 | 2.69642  | 1.24500  | H | -2.55623 | -4.44751 | -1.16597 |
| C  | 1.27994  | 3.40051  | 2.49676  | H | -4.07424 | -3.74799 | -1.74406 |
| H  | -2.71221 | 5.37434  | 0.56444  | O | 5.32673  | -0.25194 | 0.46010  |
| H  | 1.48574  | 5.52812  | 2.86790  | C | 6.23810  | 0.25227  | -0.55402 |
| H  | -0.65703 | 6.10207  | 1.74947  | C | 7.64440  | -0.06534 | -0.08850 |
| C  | -2.36525 | 4.34707  | 0.61909  | H | 6.08300  | 1.33088  | -0.66090 |
|    |          |          |          | H | 6.00230  | -0.24746 | -1.49867 |
|    |          |          |          | H | 8.36033  | 0.30162  | -0.83060 |
|    |          |          |          | H | 7.85827  | 0.41921  | 0.86891  |
|    |          |          |          | H | 7.78176  | -1.14527 | 0.02164  |

## References

- (1) Lowe, G.; Droz, A. S.; Vilaivan, T.; Weaver, G. W.; Tweedale, L.; Pratt, J. M.; Rock, P.; Yardley, V.; Croft, S. L. Cytotoxicity of (2,2':6',2' '-Terpyridine)platinum(II) Complexes to *Leishmania donovani*, *Trypanosoma cruzi*, and *Trypanosoma brucei*. *J. Med. Chem.* **1999**, *42*, 999-1006.
- (2) Yagi, M.; Tajima, S.; Komi, M.; Yamazaki, H. Highly active and tunable catalysts for O<sub>2</sub> evolution from water based on mononuclear ruthenium (II) monoquo complexes. *Dalton Trans.* **2011**, *40*, 3802-3804.
- (3) Hirahara, M.; Tsukamoto, A.; Goto, H.; Tada, S.; Yagi, M.; Umemura, Y. Visible-Light-Induced Morphological Changes of Giant Vesicles by Photoisomerization of a Ruthenium Aqua Complex. *Chem. Eur. J.* **2016**, *22*, 2590-2594.
- (4) Frisch, M. J. *et al.* Wallingford CT, 2009.
- (5) Becke, A. D. Density-functional thermochemistry. III. The role of exact exchange. *J. Chem. Phys.* **1993**, *98*, 5648-5652.
- (6) Lee, C.; Yang, W.; Parr, R. G. Development of the Colle-Salvetti correlation-energy formula into a functional of the electron density. *Phys. Rev. B* **1988**, *37*, 785-789.
- (7) O'boyle, N. M.; Tenderholt, A. L.; Langner, K. M. cclib: A library for package-independent computational chemistry algorithms. *J. Comput. Chem.* **2008**, *29*, 839-845.
- (8) Takahashi, K.; Zhang, X.; Hirahara, M.; Sato, T.; Saito, K.; Yui, T.; Yagi, M. Influence of chloro substituent on photoisomerization, redox reactions and water oxidation catalysis of mononuclear ruthenium complexes. *J. Photochem. Photobiol. A-Chem.* **2015**, *313*, 117-125.
- (9) Hirahara, M.; Goto, H.; Yamamoto, R.; Yagi, M.; Umemura, Y. Photoisomerization and thermal isomerization of ruthenium aqua complexes with chloro-substituted asymmetric bidentate ligands. *RSC Advances* **2019**, *9*, 2002-2010.
